# Supplementary material
Source: PubMed Central journal article supplement (PMC5394382)
Supplement: NIHMS856605-supplement-Supporting_Information.pdf [file NIHMS856605-supplement-Supporting_Information.pdf]

WILEY-VCH

## SUPPORTING INFORMATION

**Table of Contents**

|                              |    |
|------------------------------|----|
| Table of Contents.....       | 2  |
| Experimental Procedures..... | 3  |
| General Methods.....         | 3  |
| Biochemical Methods.....     | 3  |
| Cell Biology Methods.....    | 4  |
| Synthetic Protocols.....     | 4  |
| Results.....                 | 7  |
| List of Tables.....          | 7  |
| List of Figures.....         | 7  |
| References.....              | 39 |
| Author Contributions.....    | 39 |

## SUPPORTING INFORMATION

## Experimental Procedures

## General Methods

Silica gel 60 F254 aluminum backed thin layer chromatography plates (EMD) were used. Flash column chromatography was performed with a Mini-Flash Pump (Scientific Systems, Inc, State College, PA) using EZ-Flash cartridges (Sorbent Technologies, Norcross, GA). NMR spectra were recorded on a 500 MHz Bruker Avance II in the Solution NMR Core Facility in the Penn State College of Medicine. Chemical shifts for the  $^1\text{H}$  and  $^{13}\text{C}$  spectra are reported in parts per million (ppm,  $\delta$ ) relative to TMS, while those for the  $^{31}\text{P}$  spectra are reported relative to  $\text{H}_3\text{PO}_4$ . Mass spectra were recorded on a MDS-Sciex 4000 QTrap with electrospray ionization in the Mass Spectrometry and Proteomics Core at the Penn State College of Medicine in Hershey. High resolution mass spectra were recorded on a Waters Q-TOF Premier tandem mass spectrometer at the Proteomics and Mass Spectrometry Core Facility in University Park.

**Reagents.** [ $^{32}\text{P}$ ]ATP (6000 Ci/mmol) was purchased from Perkin Elmer, and T4 polynucleotide kinase from USB/Affymetrix. The dNTPs (ultrapure grade) were purchased from GE Healthcare, and the concentrations were determined by UV absorbance.<sup>[1]</sup> 5(6)-Carboxyfluorescein azide (FAM- $\text{N}_3$ ) was purchased from Tenova Pharmaceuticals (San Diego, CA). dGTP was purchased from (ultrapure grade) were purchased from GE Healthcare, and  $\text{N}^2$ -methyl-dGTP was purchased from TriLink Biotechnologies (San Diego, CA). The concentrations of all dGTPs was determined spectrophotometrically.

**Oligodeoxynucleotides.** Oligodeoxynucleotides were purchased from Integrative DNA technologies. The ssDNA concentration was determined at 260 nm on a Beckman DU640 UV-vis spectrophotometer. The theoretical molar extinction coefficients of the DNA sequences were determined by the method of Borer.<sup>[2]</sup> The primer strand was 5'- GCA CCG CAG ACG CAG -3' and the template strand was 5'-CTG CGA CGX CTG CGT CTG CGG TGC-3', in which X = dC, except in the fidelity studies, in which dA, dG, and dT were also employed. Primer strands were radioactively labeled at their 5' end using T4 polynucleotide kinase and [ $\gamma$ - $^{32}\text{P}$ ]ATP following the manufacturer's protocol. Primers and templates were annealed by incubation of a 20% excess of template at 95°C for 5min followed by cooling to RT over 4 h. End concentrations were 1  $\mu\text{M}$  for primer and 1.2  $\mu\text{M}$  for template.

**Polymerase purification and concentration.** Pol  $\delta$ (exo-) and PCNA were purified as described.<sup>[3]</sup> The polymerase consists of four subunits in which the exonuclease activity of the catalytic subunit was inactivated. Pol  $\kappa$ ,  $\eta$  and  $\iota$  were purified from Sf9 insect cells as described.<sup>[4]</sup> The polymerases are full length proteins with an N-terminal His-tag. His-tagged human pol  $\beta$  was purified as described.<sup>[5]</sup> Pol  $\nu$  was purified by a modification of the method described by Takata et al<sup>[6]</sup> as we previously described.<sup>[7]</sup> The protein has a deletion of a C-terminal poly proline segment, and an N-terminal His-tag, and C-terminal FLAG-tag. The concentrations of pol  $\beta$ ,  $\eta$ ,  $\iota$ ,  $\kappa$ , and  $\nu$  were determined kinetically by reaction with 300 nM DNA and 100  $\mu\text{M}$  dCTP and fit to equation 2. The amplitude was set as the active polymerase concentration.

## Biochemical Methods

**Polymerase kinetics.** Enzyme reactions were initiated by mixing equal volumes of the DNA / polymerase solution in buffer with dNTP and  $\text{MgCl}_2$  in  $\text{H}_2\text{O}$  at 37°C. The final concentrations for pol  $\beta$ ,  $\eta$ ,  $\iota$ ,  $\kappa$ , and  $\nu$  were 100 nM DNA, 10 nM polymerase, 40 mM Tris-HCl (pH 8.0), 3 mM DTT, 10  $\mu\text{g}/\text{mL}$  BSA, 2.5% glycerol. The pol  $\delta$  reactions contained 1 nM DNA, 0.1 nM pol  $\delta$  (exo-), 10 nM PCNA, 20 mM Tris-HCl (pH 7.5), 8 mM  $\text{MgCl}_2$ , 40  $\mu\text{g}/\text{mL}$  BSA, 5% glycerol. The reactions were quenched with equal volumes of STOP solution containing 10% 0.5 M  $\text{Na}_2\text{EDTA}$ , 90% formamide and 0.025% (w/v) xylene cyanol and 0.025% (w/v) bromophenol blue. Rapid reactions were performed on a RQF-3 (Kin-Tek Corporation) and quenched with 300 mM EDTA (pH 8). The reaction mixtures were analyzed by 15% polyacrylamide/7M urea denaturing gels and the radioactivity on the gels were visualized with a Typhoon 9200. The progress of the reaction was quantitated by dividing the total radioactivity in the product band(s) by the radioactivity in the product and reactant bands. Multiple product bands appeared when the incorrect dNTP was added to the reaction.

**Data analysis.** Data were fitted by nonlinear regression using the program Prism version 5 for Windows (GraphPad Software, San Diego California USA, www.graphpad.com). The  $V_{\text{max}}$  and  $K_m$  values for the pol  $\delta$  catalyzed reactions were determined by fitting the data to hyperbolic equation 1,  $v_0$  is the initial rate,  $V_{\text{max}}$  the maximum velocity, and  $N_0$  the dNTP concentrations.

$$v_0 = \frac{V_{\text{max}}N_0}{N_0 + K_m} \quad (1)$$

The time courses for the enzyme in excess were fitted to equation 2 in which  $P$  is the product concentration,  $A$  the burst amplitude,  $k$  the burst rate constant,  $k_{\text{ss}}$  the steady-state rate constant and  $t$  is time. If burst and slow phases were not evident, the data were fit to a first-order equation in which  $k_{\text{ss}}$  was set to 0. The dNTP concentration dependence was

## SUPPORTING INFORMATION

quantified by fitting the burst equation parameters to the hyperbolic equation (1) in which  $v_0$  is the value of the parameter at a specific [dNTP] and  $V_{\max}$  is the maximum value of that parameter.

$$P = A(1 - e^{-kt}) + k_{ss}t \quad (2)$$

### Cell Biology Methods

**Cell lines.** The human pancreatic ductal adenocarcinoma MiaPaCa-2 cell line was purchased from American Tissue Cell Culture (ATCC, Manassas, VA, USA) and Mouse embryo fibroblast (MEF) Polk<sup>+/+</sup>, Polk<sup>-/-</sup> cell lines were a gift from Cyrus Vaziri, University of North Carolina. The cells were maintained in culture with Dulbecco's Modified Eagle's Medium (DMEM, ThermoFisher), supplemented with penicillin (100 IU/mL), streptomycin (100 µg/mL) and heat-inactivated fetal bovine serum (FBS) to a final concentration of 10% (v/v) at 37 °C in a water saturated 5% CO<sub>2</sub> atmosphere. Every 2 - 3 days cells were passaged using trypsinization for cells to detach in order to maintain them in culture.

**EBdG Treatment.** Cells were grown on sterile glass cover slips in a 6 well culture plate in DMEM media. After 40-50 % confluency was reached, EBdG (dissolved in DMSO) was added and the cells incubated for 1 to 24 h. The final concentration of DMSO were 0.2%. At the appropriate time, the coverslips were washed three times with PBS. The cells were fixed by incubation with freshly prepared 4% paraformaldehyde in PBS for 20 minutes at room temperature. The coverslip was washed with PBS.

**EBdG Staining click chemistry.** The fixed cells on the cover slips were incubated with 1 mL of Click Reaction Solution containing 0.5 mM CuTBTA, 25 µM 5(6)-carboxyfluorescein azide (5(6)-FAM azide), 100 mM sodium ascorbate in 55% DMSO/PBS for 2 h at room temperature. After reaction, the cells were washed several times with PBS containing 0.5% Triton X-100. The cells were DAPI-stained to reveal cellular DNA.

**Fluorescence Microscopy** The cells were mounted in standard mounting media and images were collected 50-ms exposure time with identical illumination and camera settings by using a Nikon Eclipse TE 2000-U fluorescent microscope..

### Synthetic Protocols.

The syntheses of *N*<sup>2</sup>-butyl-dGTP (**5a**) and *N*<sup>2</sup>-benzy-dGTP (**5b**) were carried out as described in Scheme 1. 3',5'-O-Bis(tert-butylidimethylsilyl)-O<sup>6</sup>-(*p*-nitrophenylethyl)-2'-deoxy-2-fluoroguanosine (**2**) was synthesized as described by Adib et al.<sup>[8]</sup> The fluoride was displaced by treatment of 2 equivalents of amine in DMSO at room temperature. The reaction was followed by TLC. During the reaction, the *p*-nitrophenyl group was partially deprotected. Therefore, the crude product (**3**) was fully deprotected by treatment with TBAF prior to purification. The nucleosides purified by silica gel chromatography were contaminated with the tetra butylammonium cation. This material was further purified by reverse-phase HPLC. The triphosphates were made via the Ludwig procedure.<sup>[9]</sup> A similar protocol was employed, in the synthesis of *N*<sup>2</sup>-4-ethynylbenzyl- 2'-deoxyguanosine (**4c**). except the O<sup>6</sup>-position was protected with the trimethylsilylethyl group.<sup>[10]</sup> This group was stable during the amination with 4-ethynylbenzylamine.

## SUPPORTING INFORMATION

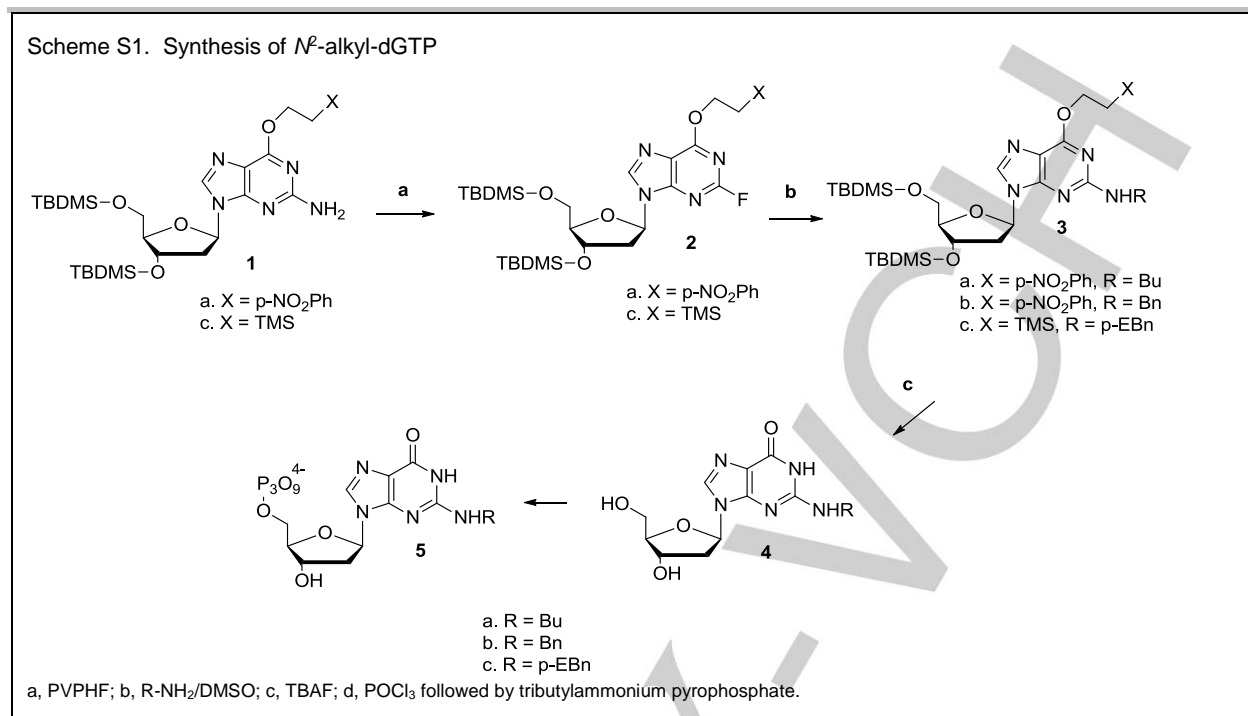

4-Ethynylbenzylamine (**7**) was prepared from 4-ethynylbenzyl alcohol (**6**) according to Scheme S2. The alcohol was mesylated, displaced with azide and reduced with LiAlH<sub>4</sub> in a single pot.

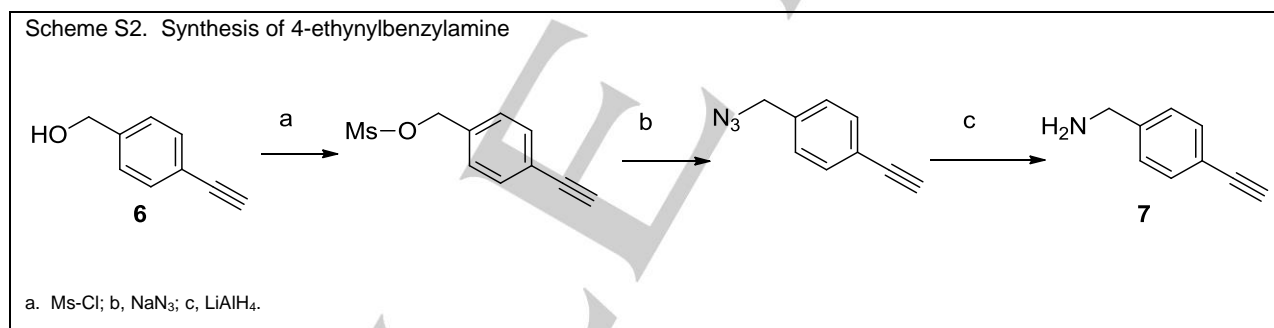

**3',5'-O-Bis(*tert*-butyldimethylsilyl)-O<sup>6</sup>-trimethylsilylethyl-2'-deoxyguanosine (1c).** 3',5'-O-Bis(*tert*-butyldimethylsilyl)-2'-deoxy-guanosine (2.0 g, 4 mmol) was reacted with 2.1 g PPh<sub>3</sub> (8 mmol), 1.15 mL trimethylsilylethanol (8 mmol) and 1.25 mL diethyl azodicarboxylate (8 mmol) in 50 mL anhydrous THF for 8 h at room temperature. The reaction mixture was poured into 100 mL saturated NaHCO<sub>3</sub> and the product extracted with 100 mL ethyl acetate (3×). The combined organic layers were dried with brine and then MgSO<sub>4</sub>. After filtration, the solution was evaporated and the product dissolved in 10 mL methylene chloride, which was loaded onto a 120 g flash column equilibrated with 10% EtOAc/hexane. The product was eluted with 20% EtOAc/hexane in a 50% yield.

**<sup>1</sup>H NMR** (500 MHz, CDCl<sub>3</sub>) δ 7.84 (s, 1H), 6.29 (t, J = 6.6 Hz, 1H), 4.92 (s, 2H), 4.55 (m, 3H), 3.95 (m, 1H), 3.77 (d/d, J = 10.8, 4.3, 1H), 3.73 (d/d, J = 10.9, 3.3, 1H), 2.54 (m, 1H), 2.32 (m, 1H), 1.20 (m, 2H), 0.89 (s, 9H), 0.88 (s, 9H), 0.077 (s, 6H), 0.055 (s, 9H), 0.049 (s, 3H), 0.043 (s, 3H), 8.18 (s, 1H), 6.38 (t, J = 6.3 Hz, 1H), 4.68 (m, 2H), 4.61 (m, 1H), 4.00 (m, 1H), 3.87 (m, 1H), 3.77 (m, 1H), 3.73 (m, 1H), 3.3 (m, 1H), 2.60 (m, 1H), 2.42 (m, 1H), 1.27 (m, 2H), 0.91 (s, 9H), 0.90 (s, 9H), 0.10 (s, 6H), 0.09 (s, 9H), 0.085 (s, 3H), 0.081 (s, 3H). **<sup>13</sup>C NMR** (500 MHz, CDCl<sub>3</sub>) δ 161.37, 159.34, 153.46, 137.26, 116.02, 87.63, 83.55, 72.01, 64.78, 62.87, 40.83, 25.96, 25.76, 18.39, 17.99, 17.59, -1.42, -4.69, -4.80, -5.40, -5.52.

**3',5'-O-Bis(*tert*-butyldimethylsilyl)-O<sup>6</sup>-trimethylsilylethyl-2-fluoro-2'-deoxy-guanosine (2c).** 3',5'-O-Bis(*tert*-butyldimethylsilyl)-O<sup>6</sup>-trimethylsilylethyl-2'-deoxy-guanosine (**1c**) (1.12 g, 1.85 mmol) was dissolved in 50 mL toluene and cooled in NaCl/ice water. Polyvinylpyridine-HF (6.7 g) and *tert*-butyl nitrite (1.6 mL, 13.5 mmol) were added. After 1h, the

## SUPPORTING INFORMATION

reactions was poured into 300 mL cold saturated NaHCO<sub>3</sub>. The solid was filtered, and the product extracted with EtOAc. The product was purified by silica gel chromatography by elution with 10% EtOAc/hexane in a 45% yield.

**<sup>1</sup>H NMR** 8.18 (s, 1H), 6.38 (t, J = 6.3 Hz, 1H), 4.68 (m, 2H), 4.61 (m, 1H), 4.00 (m, 1H), 3.87 (m, 1H), 3.77 (m, 1H), 3.3, 2.60 (m, 1H), 2.42 (m, 1H), 1.27 (m, 2H), 0.91 (s, 9H), 0.90 (s, 9H), 0.10 (s, 6H), 0.09 (s, 9H), 0.085 (s, 3H), 0.081 (s, 3H). **<sup>13</sup>C NMR** (500 MHz, CDCl<sub>3</sub>) 162.69, 162.55, 158.88, 157.18, 152.61, 152.46, 140.89, 140.86, 120.22, 120.17, 88.04, 84.58, 71.86, 66.69, 62.74, 41.27, 25.96, 25.75, 18.41, 18.00, 17.59, -1.46, -4.68, -4.82, -5.42, -5.51,

**3',5'-O-Bis(tert-butylidimethylsilyl)-O<sup>6</sup>-trimethylsilylethyl-N<sup>2</sup>-p-ethynylbenzyl-2'-deoxy-guanosine.**(3c). 3',5'-O-Bis(tert-butylidimethylsilyl)-O<sup>6</sup>-trimethylsilylethyl-2'-deoxy-2-fluoroguanosine (**2c**) (0.5 mmol) was reacted with alkylamine (1.0 mmol) for 5 h in 3 mL anhydrous DMSO. The reaction was poured into sat. NaHCO<sub>3</sub> and extracted with ethyl acetate (3 x). The combined organic phase was dried by washing with brine and then MgSO<sub>4</sub>. The filtered solution was evaporated and the product was purified by flash chromatograph, eluting with 10% EtOAc/hexane in a 60% yield

**<sup>1</sup>H NMR** (500 MHz, CDCl<sub>3</sub>) δ 7.82 (s, 1H), 7.43(d, J = 7.9 Hz, 2H), 7.31(d, J = 7.9 Hz, 2H), 6.28 (t, J = 6.5 Hz, 1H) 5.32 (t, J = 6.0 Hz, 1H), 4.62 (d, J = 6.0 Hz, 2H), 4.5 (m, 3H), 3.96 (m, 1H), 3.79 (d/d, J= 11.2, 4.6 Hz, 1H), 3.75 (d/d, J= 11.2, 3.6 Hz, 1H), 3.04 (s, 1H), 2.57(m, 1H), 2.28 (m, 1H), 1.19 (m, 2H), 0.905 (s, 9H) 0.90 (s, 9H), 0.090 (s, 9H), 0.0635 (s, 3H), 0.061 (s, 3H), 0.045 (s, 9H). **<sup>13</sup>C NMR** (500 MHz, CDCl<sub>3</sub>) δ 161.14, 158.79, 153.45, 140.78, 138.25, 132.22, 127.31, 120.78, 115.87, 87.56, 83.80, 83.55, 72.16, 64.63, 62.98, 45.78, 40.61, 25.97, 25.76, 18.40, 17.99, 17.60, -1.44, -4.67, -4.77, -5.37, -5.46.

**N<sup>2</sup>-butyl-2'-deoxyguanosine** (4a). 3',5'-O-Bis(tert-butylidimethylsilyl)-O<sup>6</sup>-(*p*-nitrophenylethyl)-2'-deoxy-2-fluoroguanosine<sup>[8]</sup> (**2a**) (350 mg, 0.54 mmol) was reacted with 106 μL butylamine (1.08 mmol) for 6 h in 3 mL anhydrous DMSO. The fluoride was displaced by treatment of 2 equivalents of amine in DMSO at room temperature. The reaction was poured into sat. NaHCO<sub>3</sub> and extracted with EtOAc (3 x). The combined organic phase was dried by washing with brine and then MgSO<sub>4</sub>. During the reaction, the *p*-nitrophenyl group was partially deprotected, thus the crude product was completely deprotected. The filtered solution was evaporated and the oil was dissolved in 2 mL 1 M tetra-*n*-butylammonium fluoride. After 2h the solution was loaded onto a silica column (120 g) which was eluted with EtOAc, 10% MeOH/EtOAc, 5% H<sub>2</sub>O/10% MeOH/EtOAc. The yield was 30%.

**<sup>1</sup>H NMR** (500 MHz, DMSO-*d*<sub>6</sub>) δ 10.45 (s, 1H), 7.88 (s, 1H), 6.44 (t, J = 5.35 Hz, 1H), 6.11 (d/d, J = 7.53, 6.43 Hz, 1H), 5.22 (d, J = 4.05 Hz, 1H), 4.80 (t, J = 5.35 Hz, 1H), 4.33 (m, 1H), 3.8 (m, 1H), 3.55 (m, 1H), 3.48 (m, 1H), 3.25 (m, 2H), 2.61 (m, 1H), 2.20 (m, 1H), 1.5 (m, 2H), 1.3 (m, 2H), 0.90(t, J = 7.35 Hz, 3H). **<sup>13</sup>C NMR** (500 MHz, DMSO-*d*<sub>6</sub>): 157.16, 153.04, 151.01, 136.28, 117.33, 88.11, 83.37, 71.40, 62.37, 58.0, 31.33, 19.94, 14.12. **MS-ESI** *m/z* 324.3 ([M+H]<sup>+</sup>), 208.3 [M - deoxyribose + 2H]<sup>+</sup>. **HRMS-ESI<sup>+</sup>**, Calculated for C<sub>14</sub>H<sub>22</sub>N<sub>5</sub>O<sub>4</sub>, 324.1679, found 324.1679.

**N<sup>2</sup>-Benzyl-2'-deoxyguanosine** (4b). 3',5'-O-Bis(tert-butylidimethylsilyl)-O<sup>6</sup>-(*p*-nitrophenylethyl)-2'-deoxy-2-fluoroguanosine (**2a**) (235 mg, 0.36 mmol) was reacted with 81 μL benzylamine (0.74 mmol) for 5 h in 2 mL anhydrous DMSO. The reaction was poured into sat. NaHCO<sub>3</sub> and extracted with ethyl acetate (3 x). The combined organic phase was dried by washing with brine and then MgSO<sub>4</sub>. The filtered solution was evaporated and the oil was dissolved in 2 mL 1 M tetra-*n*-butylammonium fluoride. After 2h the solution was loaded onto a 40 g silica column which was eluted with EtOAc, 10% MeOH/EtOAc, 5% H<sub>2</sub>O/10% MeOH/EtOAc. The yield was 33 %.

**<sup>1</sup>H NMR** (500 MHz, DMSO-*d*<sub>6</sub>) 10.45 (s, 1H), 7.88 (s, 1H), 7.3 (m, 4H), 7.0 (m, 1H), 6.15 (d/d, J= 7.48, 6.48, 1H), 5.23 (d, J = 4.05 Hz, 1H), 4.82 (t, J = 5.4 Hz, 1H), 4.32 (m, 1H), 3.79 (m, 1H), 3.545 (m, 1H), 3.45 (m, 1H), 2.56 (m, 1H), 2.16 (m, 1H). **<sup>13</sup>C NMR** (500 MHz, DMSO-*d*<sub>6</sub>):157.33, 153.05, 150.81, 139.52, 136.34, 128.85, 127.92, 127.50, 117.59, 85.82, 83.40, 79.65, 71.34, 62.30, 48.23, 44.53. **MS-ESI** *m/z* 358.2 [M+H]<sup>+</sup>, 241.1 [M-deoxyribose+H]<sup>+</sup> **HRMS-ESI<sup>+</sup>**: Calculated for C<sub>17</sub>H<sub>20</sub>N<sub>5</sub>O<sub>4</sub> 358.1515, found 358.1512.

**N<sup>2</sup>-p-ethynylbenzyl-2'-deoxyguanosine.** (4c). 3',5'-O-Bis(tert-butylidimethylsilyl)-O<sup>6</sup>-trimethylsilylethyl-N<sup>2</sup>-*p*-ethynylbenzyl-2'-deoxy-2-fluoroguanosine was stirred with 10 equivalents of 1 M tetra-*n*-butylammonium fluoride for 1 h at room temperature. The solution was loaded onto a 40 g silica column which was eluted with EtOAc and then 10% MeOH/EtOAc. The yield was 66%.

**<sup>1</sup>H NMR** (500 MHz, DMSO-*d*<sub>6</sub>) δ 10.65 (s, 1H), 7.96 (s, 1H), 7.45(d, 2H), 7.35 (d, 2H), 6.9 (m, 1H), , 6.10 (t, 1H) , 5.41 (d, 1H), 4.80 (t, 1H), 4.33 (m, 1H) , 3.8 (m, 1H), 3.55 (m, 1H), 3.48 (m, 1H), 3.25 (t, 2H), 2.61 (m, 1H), 2.20 (m, 1H), 1.5 (m, 2H), 1.3 (m, 2H), 0.90(t, 3H). **MS-ESI**. 382.2 [M+1], 266.3[M+1-dR]. **HRMS-ESI<sup>+</sup>**: Calculated for C<sub>19</sub>H<sub>20</sub>N<sub>5</sub>O<sub>4</sub>, 382.1515, found 382.1510.

**N<sup>2</sup>-butyl-2'-deoxyguanosine 5'-O-triphosphate (5a) and N<sup>2</sup>-benzyl-2'-deoxyguanosine 5'-O-triphosphate (5b).** N<sup>2</sup>-Alkyl-2'-deoxyguanosine (4) (170 mmol) and tributylamine (100 μL, 430 mmol) were dissolved in 1 mL trimethyl phosphate



## SUPPORTING INFORMATION

that was dried over molecular sieves. The solution was cooled in a NaCl/ice water bath. Freshly distilled  $\text{POCl}_3$  (24  $\mu\text{L}$ , 255 mmol) was added and the reaction was stirred for 5 min. An additional 16  $\mu\text{L}$   $\text{POCl}_3$  (170 mmol) was added and the reaction was stirred for an additional 5 min. To this solution was added an ice-cold solution of anhydrous acetonitrile (1 mL) containing 75 mg tributylammonium pyrophosphate (200 mmol) and 245  $\mu\text{L}$  tributylamine (1050 mmol). After stirring for 10 min, the reaction was quenched by addition of 10 mL cold  $\text{H}_2\text{O}$ . The aqueous solution was washed with  $\text{CH}_2\text{Cl}_2$  and evaporated. The solid was redissolved in  $\text{H}_2\text{O}$  and loaded onto a 1  $\times$  10 cm DEAE-cellulose that was equilibrated with 50 mM triethylamine-carbonate (pH 7.5). The column was eluted with a 500 mL gradient from 50 mM to 1 M triethylamine-carbonate (pH 7.5). The triphosphate eluted at approximately 500 mM buffer. The total conversion was 10-15 % for the various syntheses.

***N*<sup>2</sup>-butyl-2'-deoxyguanosine 5'-triphosphate.** <sup>1</sup>H NMR (500 MHz,  $\text{D}_2\text{O}$ )  $\delta$  10.45 (s, 1H), 7.88 (s, 1H), 6.44 (t, J = 5.35 Hz, 1H), 6.11 (d/d, J = 7.53, 6.43 Hz, 1H), 5.22 (d, J = 4.05 Hz, 1H), 4.80 (t, J = 5.35 Hz, 1H), 4.33 (m, 1H), 3.8 (m, 1H), 3.55 (m, 1H), 3.48 (m, 1H), 3.25 (t, J = , 2H), 2.61 (m, 1H), 2.20 (m, 1H), 1.5 (m, 2H), 1.3 (m, 2H), 0.90 (t, J = 7.35 Hz, 3H). <sup>31</sup>P NMR (500 MHz,  $\text{D}_2\text{O}$ ) -10.4, -11.1, -23.1. **MS-ESI** 564.4 [M+1], 208.2 [M-dRTP+1]. **HRMS-ESI**<sup>-</sup>: calculated for  $\text{C}_{14}\text{H}_{23}\text{N}_5\text{O}_{13}\text{P}_3$ : 562.0505; found: 562.0491.

***N*<sup>2</sup>-benzyl-2'-deoxyguanosine 5'-triphosphate.** <sup>1</sup>H NMR (500 MHz,  $\text{D}_2\text{O}$ ) 10.45 (s, 1H), 7.88 (s, 1H), 7.3 (m, 4H), 7.0 (m, 1H), 6.15 (d/d, J = 7.48, 6.48, 1H), 5.23 (d, J = 4.05 Hz, 1H), 4.82 (t, J = 5.4 Hz, 1H), 4.32 (m, 1H), 3.79 (m, 1H), 3.545 (m, 1H), 3.45 (m, 1H), 2.56 (m, 1H), 2.16 (m, 1H). <sup>31</sup>P NMR (500 MHz,  $\text{D}_2\text{O}$ ) -9.6, -11.1, -22.9. **MS-ESI** 598.2 [M+1], 242.1 [M-dRTP+1]. **HRMS-ESI**<sup>-</sup> calculated for  $\text{C}_{14}\text{H}_{23}\text{N}_5\text{O}_{13}\text{P}_3$ : 596.0349; found: 596.0339.

**4-Ethynylbenzylamine (7).** (4-Ethynylphenyl)methanol (**6**) (2.7 g, 20.4 mmol) was dissolved in 50 mL anhydrous THF and cooled in an ice bath under nitrogen atmosphere. Triethylamine (4.3 mL, 25.5 mmol) and 1.9 mL methanesulfonyl chloride (25 mmol) were added and the reaction was stirred for 45 min. The solvent was reduced to 10 mL and the reaction quenched by the addition of 20 mL cold  $\text{NaHCO}_3$ . The product was extracted with  $\text{CH}_2\text{Cl}_2$  (3x). The combined extracts were dried with brine and  $\text{MgSO}_4$ . The filtered  $\text{CH}_2\text{Cl}_2$  was evaporated to an oil which was dissolved in anhydrous DMF (30 mL). Sodium azide (2.7 g, 42 mmol) was added and the reaction was stirred overnight. The DMF was evaporated, the oil mixed with 50 mL  $\text{H}_2\text{O}$  and the product was extracted with 50 mL  $\text{CH}_2\text{Cl}_2$  (3x). The combined organic extracts were dried and evaporated. The crude azide was dissolved in 30 mL anhydrous THF and cooled in an ice  $\text{H}_2\text{O}$  bath. 2.4 g  $\text{LiAlH}_4$  was added and stirred for 1 h.

<sup>1</sup>H NMR (500 MHz,  $\text{CDCl}_3$ ) 7.74 (d, J = 8.1 Hz, 2H), 7.27 (d, J = 8.1 Hz, 2H), 3.87 (s, 3H), 3.05 (s, 1H), 1.47 (s, 2H). **HRMS-ESI**<sup>+</sup>: calculated for  $\text{C}_9\text{H}_{10}\text{N}$ , 132.0813; found: 132.0805.

## Results

### List of Tables

|           |                                                                                             |    |
|-----------|---------------------------------------------------------------------------------------------|----|
| Table S1. | Kinetic parameters for the incorporation of <i>N</i> <sup>2</sup> -alkyl-dGTPs opposite dC. | 9  |
| Table S2. | Fidelity of pol $\kappa$ incorporation of dGTP and <i>N</i> <sup>2</sup> -Bn-dGTP           | 10 |

### List of Figures

|            |                                                                                                    |    |
|------------|----------------------------------------------------------------------------------------------------|----|
| Figure S1. | PAGE analysis of the incorporation of dGTP and <i>N</i> <sup>2</sup> -alkyl-dGTPs                  | 11 |
| Figure S2. | Pol $\kappa$ catalyzed incorporation of <i>N</i> <sup>2</sup> -alkyl-dGTP opposite dC time course. | 12 |
| Figure S3. | Pol $\kappa$ catalyzed incorporation of <i>N</i> <sup>2</sup> -alkyl-dGTP opposite dC.             | 12 |
| Figure S4. | Pol $\eta$ catalyzed incorporation of <i>N</i> <sup>2</sup> -alkyl-dGTP opposite dC time course.   | 13 |
| Figure S5. | Pol $\eta$ catalyzed incorporation of <i>N</i> <sup>2</sup> -alkyl-dGTP opposite dC.               | 13 |
| Figure S6. | Pol $\iota$ catalyzed incorporation of <i>N</i> <sup>2</sup> -alkyl-dGTP opposite dC time course.  | 14 |
| Figure S7. | Pol $\iota$ catalyzed incorporation of <i>N</i> <sup>2</sup> -alkyl-dGTP opposite dC.              | 14 |
| Figure S8. | Pol $\beta$ catalyzed incorporation of <i>N</i> <sup>2</sup> -alkyl-dGTP opposite dC.              | 15 |

## SUPPORTING INFORMATION

|                                                                                                                                                                                 |    |
|---------------------------------------------------------------------------------------------------------------------------------------------------------------------------------|----|
| Figure S9. Pol $\beta$ catalyzed incorporation of $N^2$ -alkyl-dGTP opposite dC. ....                                                                                           | 16 |
| Figure S10. Pol $\nu$ catalyzed incorporation of $N^2$ -alkyl-dGTP opposite dC. ....                                                                                            | 17 |
| Figure S11. Pol $\nu$ catalyzed incorporation of $N^2$ -alkyl-dGTP opposite dC. ....                                                                                            | 17 |
| Figure S12. Pol $\delta$ -catalyzed incorporation of $N^2$ -alkyl-dGTP opposite dC. ....                                                                                        | 18 |
| Figure S13. $^1\text{H}$ NMR (DMSO- $d_6$ ) $N^2$ -butyl-2'-deoxyguanosine. ....                                                                                                | 19 |
| Figure S14. $^{13}\text{C}$ NMR (DMSO- $d_6$ ) $N^2$ -butyl-2'-deoxyguanosine. ....                                                                                             | 20 |
| Figure S15. ESI MS $N^2$ -butyl-dG. ....                                                                                                                                        | 21 |
| Figure S16. $^1\text{H}$ NMR ( $\text{D}_2\text{O}$ ) $N^2$ -butyl-dGTP. ....                                                                                                   | 22 |
| Figure S17. $^{31}\text{P}$ NMR ( $\text{D}_2\text{O}$ ) $N^2$ -butyl-dGTP. ....                                                                                                | 23 |
| Figure S18. ESI MS $N^2$ -butyl-dGTP. ....                                                                                                                                      | 24 |
| Figure S19. $^1\text{H}$ NMR (DMSO- $d_6$ ) of $N^2$ -benzyl-2'-deoxyguanosine. ....                                                                                            | 25 |
| Figure S20. $^{13}\text{C}$ NMR (DMSO- $d_6$ ) $N^2$ -benzyl-2'-deoxyguanosine. ....                                                                                            | 26 |
| Figure S21. ESI MS $N^2$ -Bn-dG. ....                                                                                                                                           | 27 |
| Figure S22. $^1\text{H}$ NMR ( $\text{D}_2\text{O}$ ) $N^2$ -benzyl-dGTP. ....                                                                                                  | 28 |
| Figure S23. $^{31}\text{P}$ NMR ( $\text{D}_2\text{O}$ ) $N^2$ -benzyl-dGTP. ....                                                                                               | 29 |
| Figure S24. ESI MS $N^2$ -benzyl-dGTP. ....                                                                                                                                     | 30 |
| Figure S25. $^1\text{H}$ NMR ( $\text{CDCl}_3$ ) 3',5'-O-Bis( <i>tert</i> -butyldimethylsilyl)- $O^6$ -trimethylsilylethyl-2'-deoxy-guanosine. ....                             | 31 |
| Figure S26. $^{13}\text{C}$ NMR ( $\text{CDCl}_3$ ) 3',5'-O-Bis( <i>tert</i> -butyldimethylsilyl)- $O^6$ -trimethylsilylethyl-2'-deoxy-guanosine. ....                          | 32 |
| Figure S27. $^1\text{H}$ NMR ( $\text{CDCl}_3$ ) 3',5'-O-Bis( <i>tert</i> -butyldimethylsilyl)- $O^6$ -trimethylsilylethyl-2'-deoxy-2-fluoroguanosine. ....                     | 33 |
| Figure S28. $^{13}\text{C}$ NMR ( $\text{CDCl}_3$ ) 3',5'-O-Bis( <i>tert</i> -butyldimethylsilyl)- $O^6$ -trimethylsilylethyl-2'-deoxy-2-fluoroguanosine. ....                  | 34 |
| Figure S29. $^1\text{H}$ NMR ( $\text{CDCl}_3$ ) Bis( <i>tert</i> -butyldimethylsilyl)- $O^6$ -trimethylsilylethyl- $N^2$ - <i>p</i> -ethynylbenzyl-2'-deoxy-guanosine. ....    | 35 |
| Figure S30. $^{13}\text{C}$ NMR ( $\text{CDCl}_3$ ) Bis( <i>tert</i> -butyldimethylsilyl)- $O^6$ -trimethylsilylethyl- $N^2$ - <i>p</i> -ethynylbenzyl-2'-deoxy-guanosine. .... | 36 |
| Figure S31. $^1\text{H}$ NMR (DMSO- $d_6$ ). $N^2$ - <i>p</i> -ethynylbenzyl-2'-deoxy-guanosine. ....                                                                           | 37 |
| Figure S32. ESI-MS $N^2$ - <i>p</i> -ethynylbenzyl-2'-deoxy-guanosine. ....                                                                                                     | 38 |



## SUPPORTING INFORMATION

Table S1. Kinetic parameters for the incorporation of *N*<sup>2</sup>-alkyl-dGTPs opposite dC.<sup>a</sup>

| pol | dGTP                                       |                            | <i>N</i> <sup>2</sup> -Me-dGTP             |                            | <i>N</i> <sup>2</sup> -Bu-dGTP                                                     |                            | <i>N</i> <sup>2</sup> -Bn-dGTP                                                     |                            |
|-----|--------------------------------------------|----------------------------|--------------------------------------------|----------------------------|------------------------------------------------------------------------------------|----------------------------|------------------------------------------------------------------------------------|----------------------------|
|     | <i>k</i> <sub>pol</sub> (s <sup>-1</sup> ) | <i>K</i> <sub>d</sub> (μM) | <i>k</i> <sub>pol</sub> (s <sup>-1</sup> ) | <i>K</i> <sub>d</sub> (μM) | <i>k</i> <sub>pol</sub> (s <sup>-1</sup> )                                         | <i>K</i> <sub>d</sub> (μM) | <i>k</i> <sub>pol</sub> (s <sup>-1</sup> )                                         | <i>K</i> <sub>d</sub> (μM) |
| β   | 4.3 ± 0.2                                  | 12 ± 2                     | 0.0088 ± 0.0001                            | 84 ± 4                     | <i>k</i> <sub>pol</sub> / <i>K</i> <sub>d</sub> <sup>dNTP</sup> < 10 <sup>-6</sup> |                            | <i>k</i> <sub>pol</sub> / <i>K</i> <sub>d</sub> <sup>dNTP</sup> < 10 <sup>-6</sup> |                            |
| η   | 14 ± 3                                     | 23 ± 10                    | 15 ± 7                                     | 84 ± 58                    | (20 ± 10) × 10 <sup>-4</sup>                                                       | 50 ± 5                     | <i>k</i> <sub>pol</sub> / <i>K</i> <sub>d</sub> <sup>dNTP</sup> < 10 <sup>-6</sup> |                            |
| ι   | 12 ± 1                                     | 21 ± 6                     | 6.5 ± 1.3                                  | 18 ± 9                     | (9 ± 2) × 10 <sup>-4</sup>                                                         | 180 ± 10                   | (11 ± 1) × 10 <sup>-4</sup>                                                        | 29 ± 1                     |
| κ   | 12 ± 1                                     | 11 ± 2                     | 11 ± 1                                     | 20 ± 5                     | 0.56 ± 0.02                                                                        | 14 ± 2                     | 9.3 ± 2.7                                                                          | 23 ± 6                     |
| ν   | 17 ± 1                                     | 26 ± 5                     | (6.0 ± 0.2) × 10 <sup>-4</sup>             | 80 ± 4                     | (3.7 ± 0.2) × 10 <sup>-4</sup>                                                     | 74 ± 14                    | (8.2 ± 0.3) × 10 <sup>-4</sup>                                                     | 210 ± 20                   |
|     | <i>k</i> <sub>cat</sub> (s <sup>-1</sup> ) | <i>K</i> <sub>m</sub> (μM) | <i>k</i> <sub>cat</sub> (s <sup>-1</sup> ) | <i>K</i> <sub>m</sub> (μM) | <i>k</i> <sub>cat</sub> (s <sup>-1</sup> )                                         | <i>K</i> <sub>m</sub> (μM) | <i>k</i> <sub>cat</sub> (s <sup>-1</sup> )                                         | <i>K</i> <sub>m</sub> (μM) |
| δ   | 0.066 ± 0.003                              | 54 ± 6                     | (3.1 ± 0.2) × 10 <sup>-4</sup>             | 88 ± 12                    | (1.9 ± 0.2) × 10 <sup>-5</sup>                                                     | 81 ± 24                    | (1.5 ± 0.4) × 10 <sup>-6</sup>                                                     | 81 ± 76                    |

a. Reactions contained 100 nM DNA, 10 nM polymerase, 40 mM Tris-HCl (pH 8.0), 3 mM DTT, 10 μg/mL BSA, 2.5% glycerol. The pol δ reactions contained 1 nM DNA, 0.1 nM pol δ (exo-), 10 nM PCNA, 20 mM Tris-HCl (pH 7.5), 8 mM MgCl<sub>2</sub>, 40 μg/mL BSA, 5% glycerol. The values are the mean of three experiments ± s.e.m.. The DNA substrate was:

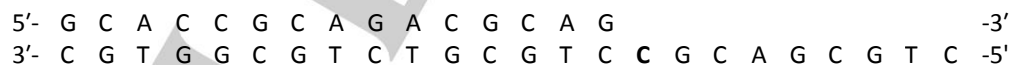

## SUPPORTING INFORMATION

Table S2. Fidelity of pol  $\kappa$  incorporation of dGTP and  $N^2$ -Bn-dGTP<sup>a</sup>

| dGTP           |                                        |                                  |                                                                |                  |
|----------------|----------------------------------------|----------------------------------|----------------------------------------------------------------|------------------|
| template       | $k_{\text{cat}}$ ( $\text{min}^{-1}$ ) | $K_{\text{m}}$ ( $\mu\text{M}$ ) | $k_{\text{cat}}/K_{\text{m}}$ ( $\text{M}^{-1}\text{s}^{-1}$ ) | $f_{\text{inc}}$ |
| dA             | 0.071 $\pm$ 0.0060                     | 226 $\pm$ 43                     | 5.22 $\pm$ 0.59                                                | 0.072            |
| dC             | 0.51 $\pm$ 0.02                        | 117 $\pm$ 12                     | 72 $\pm$ 5                                                     | 1                |
| dG             | 0.092 $\pm$ 0.008                      | 304 $\pm$ 55                     | 5.013 $\pm$ 0.49                                               | 0.069            |
| dT             | 0.089 $\pm$ 0.006                      | 275 $\pm$ 42                     | 5.37 $\pm$ 0.45                                                | 0.074            |
| $N^2$ -Bn-dGTP |                                        |                                  |                                                                |                  |
| template       | $k_{\text{cat}}$ ( $\text{min}^{-1}$ ) | $K_{\text{m}}$ ( $\mu\text{M}$ ) | $k_{\text{cat}}/K_{\text{m}}$ ( $\text{M}^{-1}\text{s}^{-1}$ ) | $f_{\text{inc}}$ |
| dA             | 0.021 $\pm$ 0.003                      | 599 $\pm$ 186                    | 0.59 $\pm$ 0.09                                                | 0.014            |
| dC             | 0.170 $\pm$ 0.006                      | 71 $\pm$ 7                       | 40 $\pm$ 3                                                     | 1                |
| dG             | 0.0073 $\pm$ 0.0003                    | 174 $\pm$ 22                     | 0.70 $\pm$ 0.07                                                | 0.017            |
| dT             | 0.0064 $\pm$ 0.0004                    | 169 $\pm$ 38                     | 0.63 $\pm$ 0.11                                                | 0.015            |

a. Reactions were conducted with 10 nM DNA, 0.1 nM polymerase, 40 mM Tris-HCl (pH 8.0), 3 mM DTT, 10  $\mu\text{g}/\text{mL}$  BSA, 2.5% glycerol, at 37 °C. The DNA substrate was:

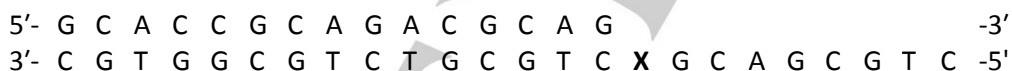

In which the template base (X) is listed. The incubation times varied from 5 - 10 min for dC as template to 0.5 - 2 h for mismatch formation. The values are the mean of three experiments  $\pm$  the standard error.

b.  $f_{\text{inc}} = (k_{\text{cat}}/K_{\text{m}})^{\text{dN}} / (k_{\text{cat}}/K_{\text{m}})^{\text{dC}}$

## SUPPORTING INFORMATION

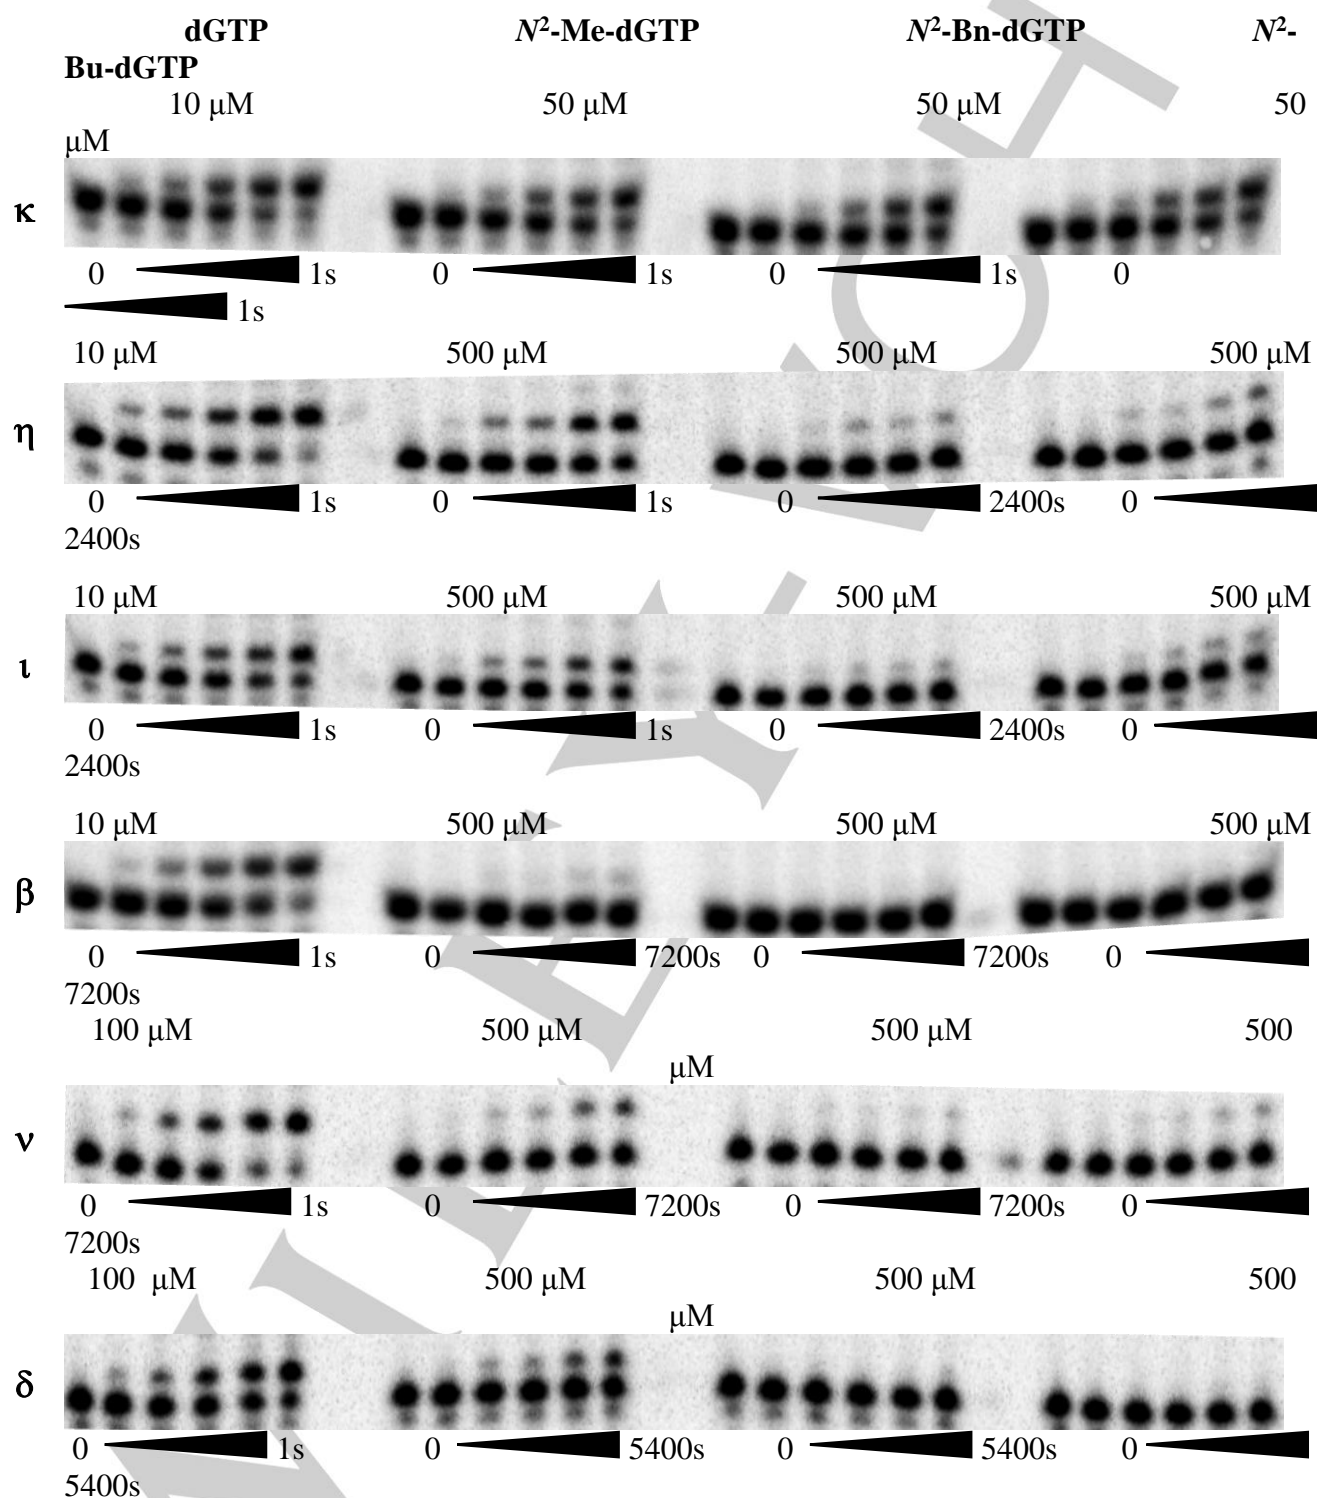

Figure S1. PAGE analysis of the incorporation of dGTP and  $N^2$ -alkyl-dGTPs opposite dC by pol  $\kappa$ ,  $\eta$ ,  $\iota$ ,  $\beta$ ,  $\nu$ , and  $\delta$ /PCNA. The DNA concentration was 10 nM, the dNTP concentration is as listed. The polymerase

## SUPPORTING INFORMATION

concentration varied from 10 to 100 nM to obtain similar reaction profiles for the dGTP reactions. In each panel, the lower band is the 15-mer starting material and the upper band is the 16-mer product.

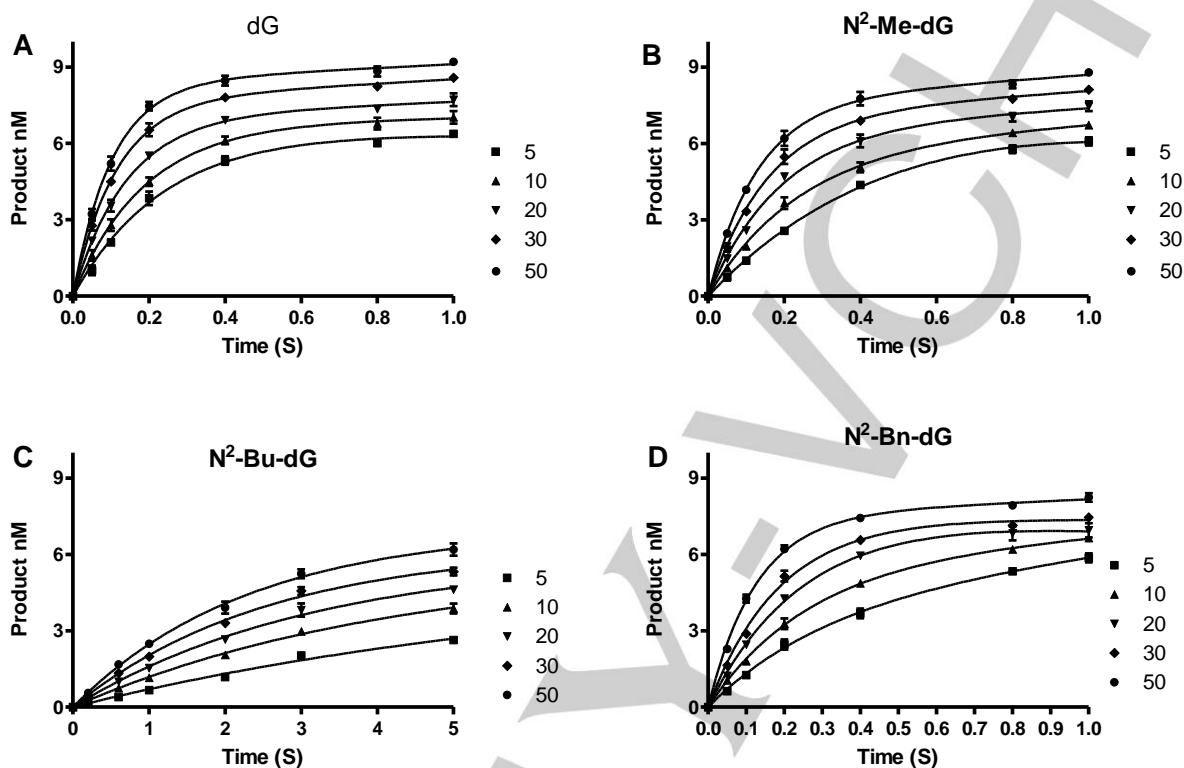

Figure S2. Pol  $\kappa$  catalyzed incorporation of  $N^2$ -alkyl-dGTP opposite dC time course. The reaction was carried out with 100 nM pol  $\kappa$ , 10 nM DNA, with various concentrations of (A) dGTP, (B)  $N^2$ -Me-dGTP, (C)  $N^2$ -Bu-dBGTP, and (D)  $N^2$ -Bn-dGTP. The lines are the best fit to the burst equation.

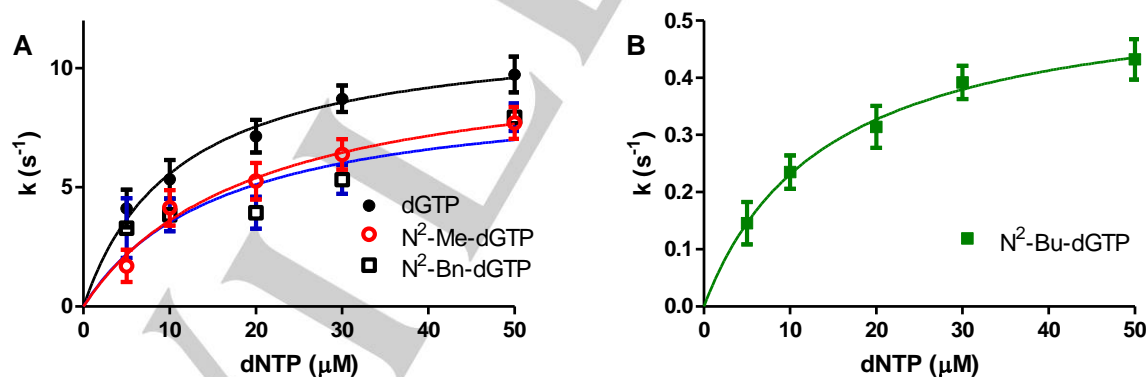

Figure S3. Pol  $\kappa$  catalyzed incorporation of  $N^2$ -alkyl-dGTP opposite dC. dNTP-concentration dependence on the burst rate constant. The lines are the best fit to the hyperbolic equation.

## SUPPORTING INFORMATION

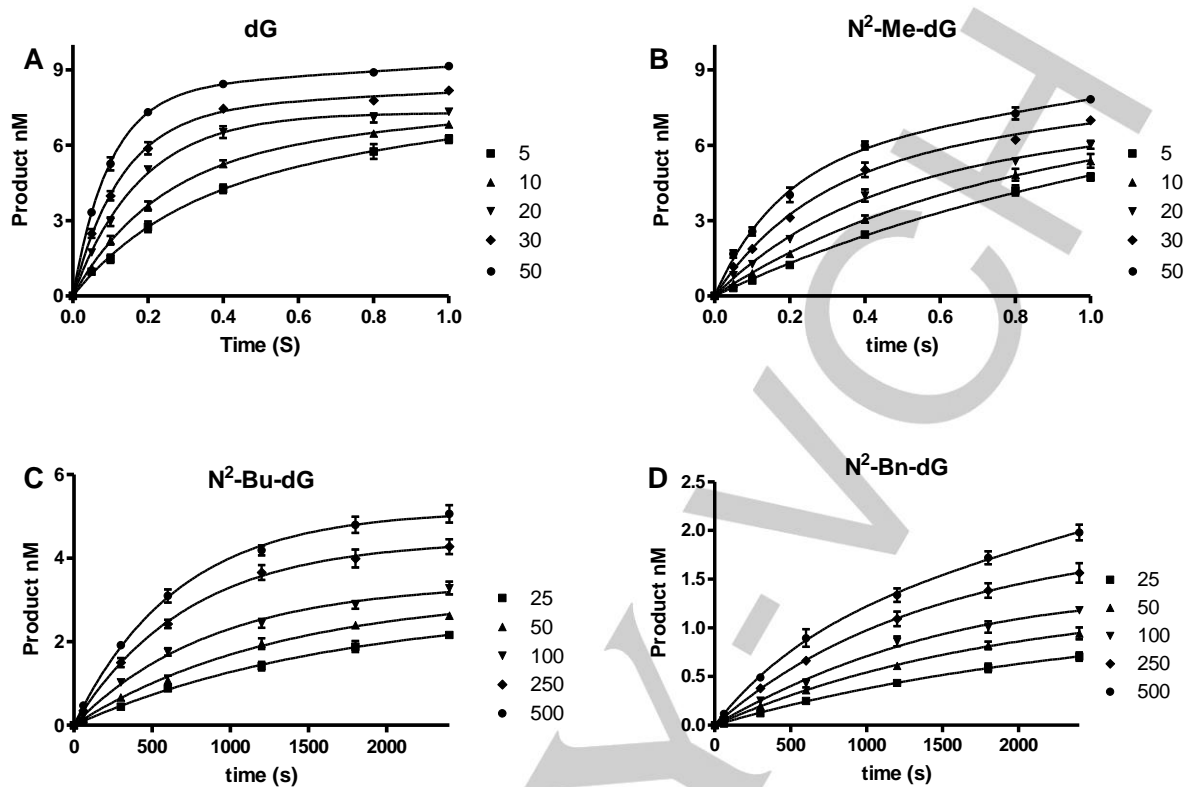

Figure S4. Pol  $\eta$  catalyzed incorporation of  $N^2$ -alkyl-dGTP opposite dC time course. The reaction was carried out with 100 nM pol  $\kappa$ , 10 nM DNA, with various concentrations of (A) dGTP, (B)  $N^2$ -Me-dGTP, (C)  $N^2$ -Bu-dBGTP, and (D)  $N^2$ -Bn-dGTP.

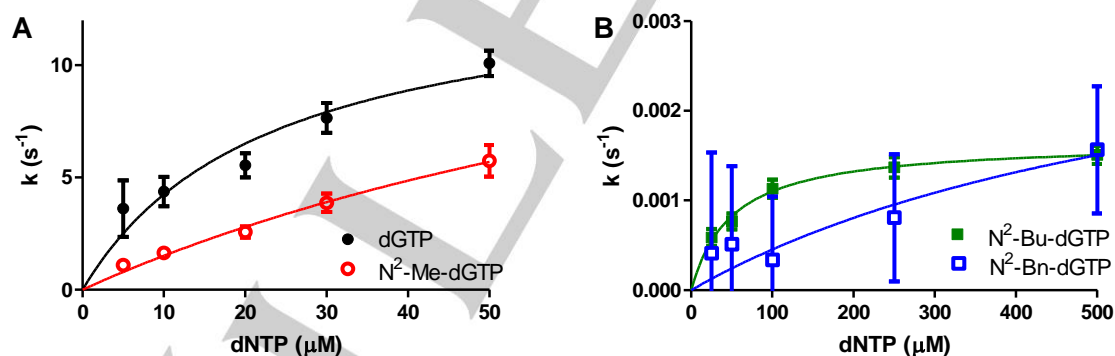

Figure S5. Pol  $\eta$  catalyzed incorporation of  $N^2$ -alkyl-dGTP opposite dC. dNTP-concentration dependence on the burst rate constant. The lines are the best fit to the hyperbolic equation.

## SUPPORTING INFORMATION

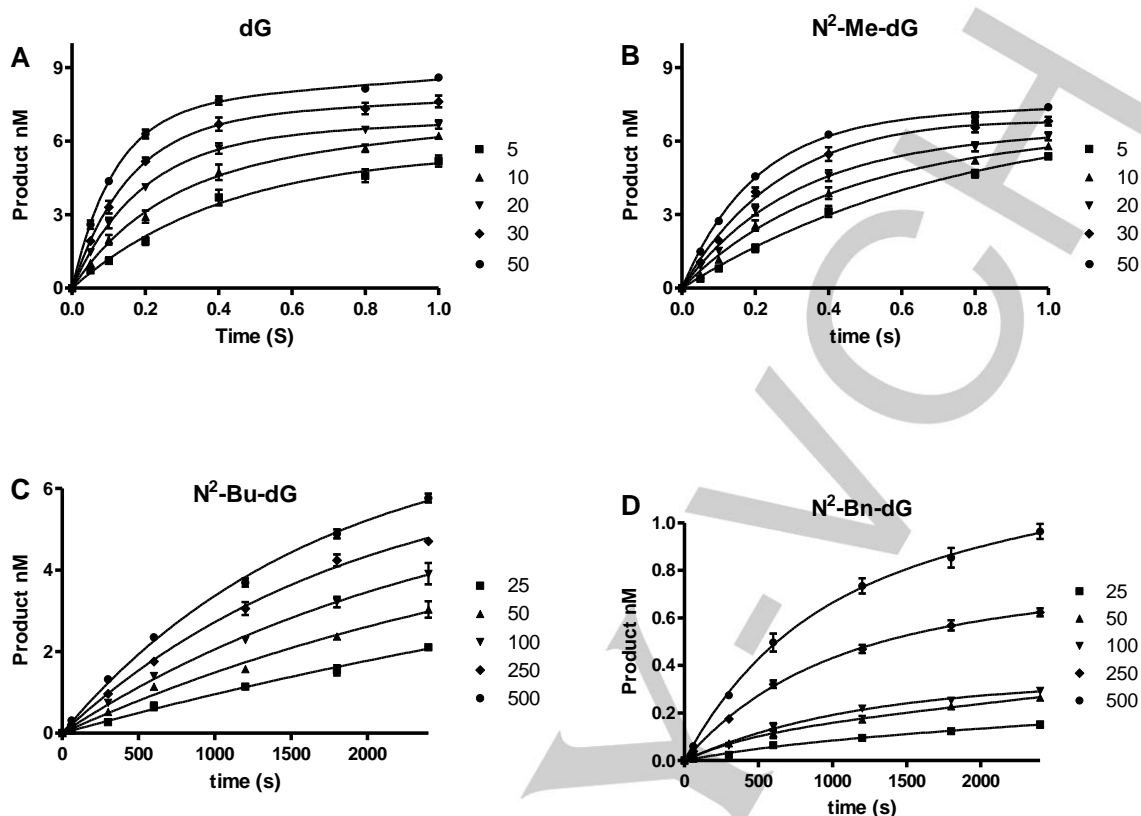

Figure S6. Pol  $\iota$  catalyzed incorporation of  $N^2$ -alkyl-dGTP opposite dC time course. The reaction was carried out with 100 nM pol  $\iota$ , 10 nM DNA, with various concentrations of (A) dGTP, (B)  $N^2$ -Me-dGTP, (C)  $N^2$ -Bu-dBGTP, and (D)  $N^2$ -Bn-dGTP.

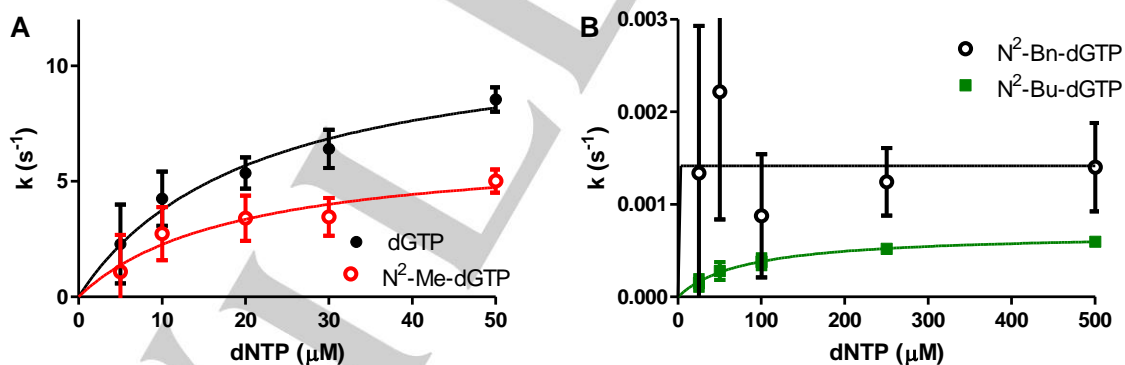

Figure S7. Pol  $\iota$  catalyzed incorporation of  $N^2$ -alkyl-dGTP opposite dC. dNTP-concentration dependence on the burst rate constant. The lines are the best fit to the hyperbolic equation. The  $N^2$ -Bn-dGTP reaction does not give  $k_{pol}$  or  $K_d$  values but gives an upper estimate of  $k_{pol}/K_d$ .



## SUPPORTING INFORMATION

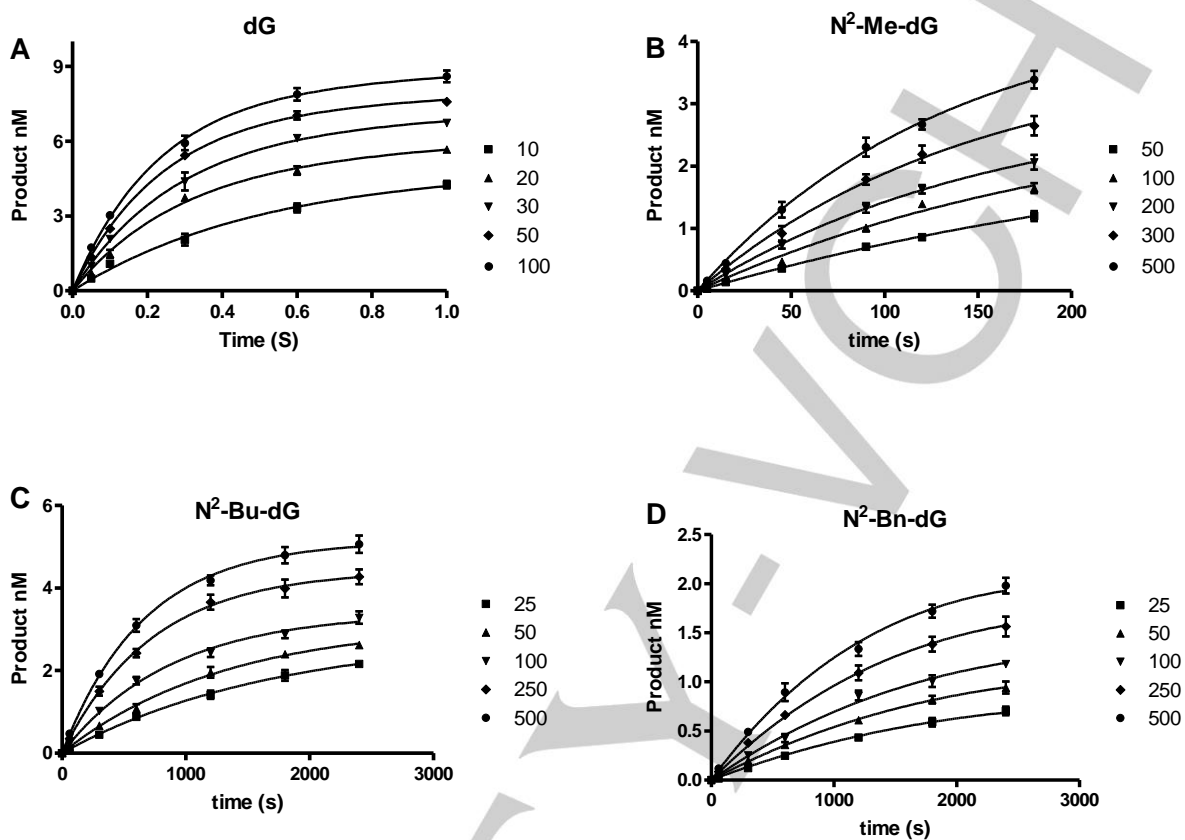

Figure S8. Pol  $\beta$  catalyzed incorporation of  $N^2$ -alkyl-dGTP opposite dC. The reaction was carried out with 100 nM pol  $\kappa$ , 10 nM DNA, with various concentrations of (A) dGTP, (B)  $N^2$ -Me-dGTP, (C)  $N^2$ -Bu-dGTP, and (D)  $N^2$ -Bn-dGTP.

## SUPPORTING INFORMATION

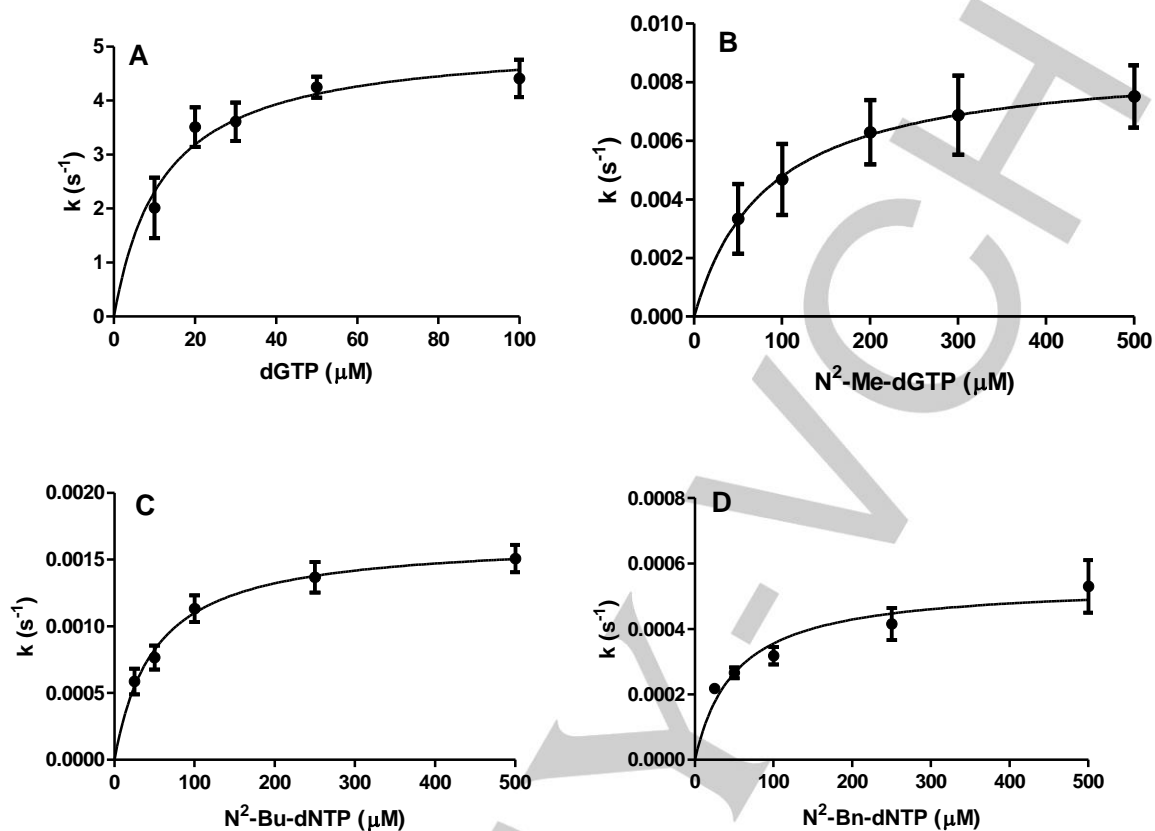

Figure S9. Pol  $\beta$  catalyzed incorporation of  $N^2$ -alkyl-dGTP opposite dC. dNTP-concentration dependence on the burst rate constant. The lines are the best fit to the hyperbolic equation

## SUPPORTING INFORMATION

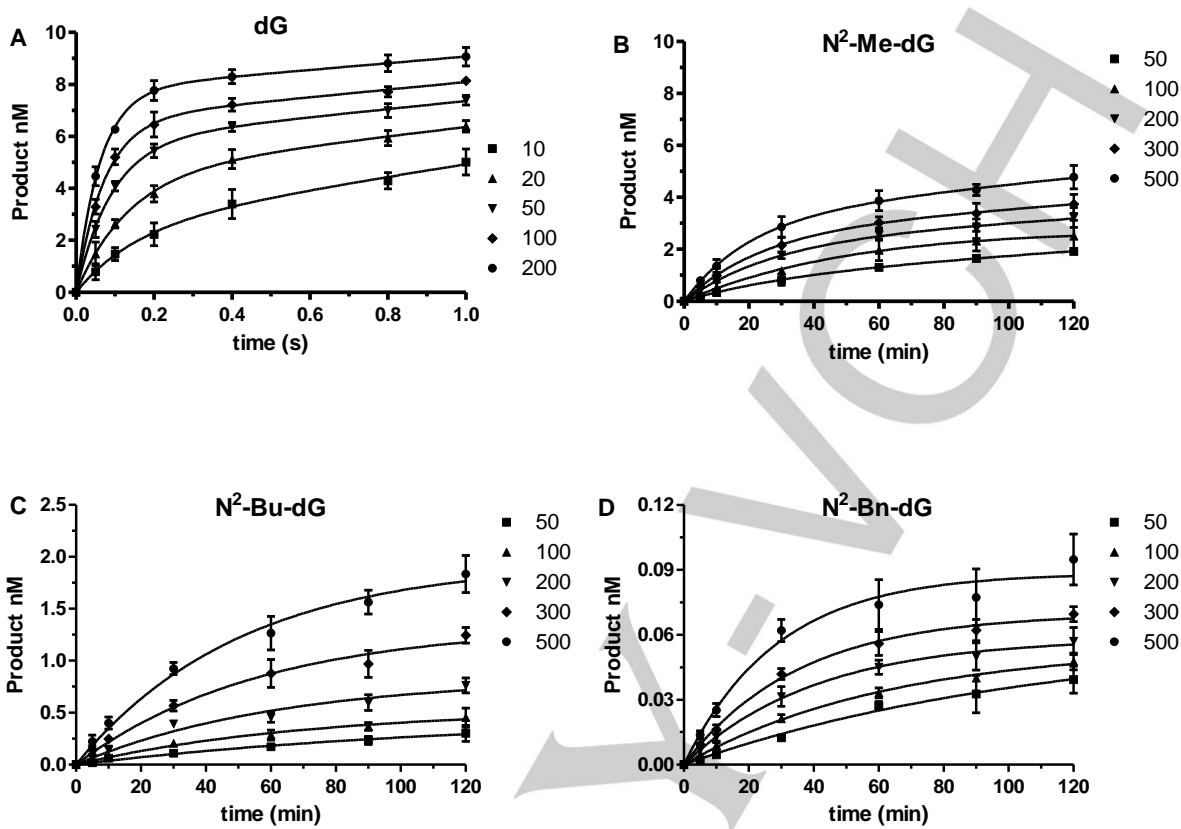

Figure S10. Pol v catalyzed incorporation of  $N^2$ -alkyl-dGTP opposite dC. The reaction was carried out with 100 nM pol  $\kappa$ , 10 nM DNA, with various concentrations of (A) dGTP, (B)  $N^2$ -Me-dGTP, (C)  $N^2$ -Bu-dGTP, and (D)  $N^2$ -Bn-dGTP. The lines are the best fit to the burst equation (A and B) and the first-order equation (C and D).

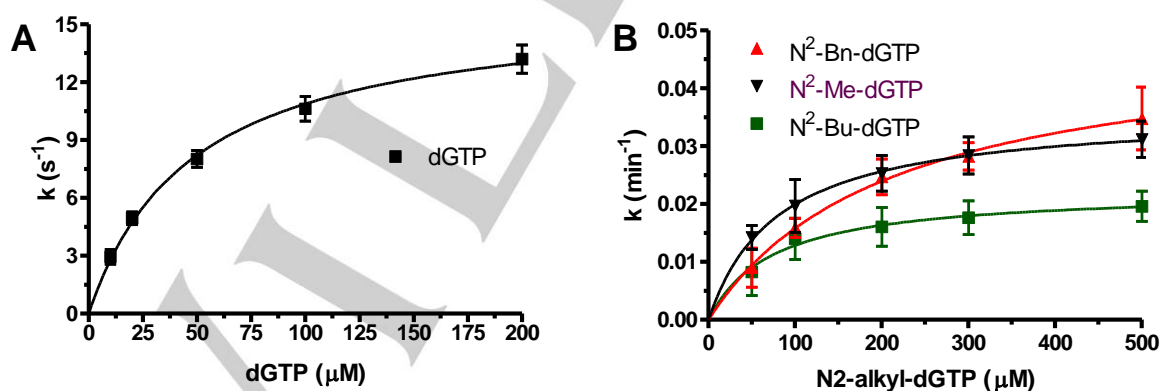

Figure S11. Pol v catalyzed incorporation of  $N^2$ -alkyl-dGTP opposite dC. dNTP-concentration dependence on the burst rate constant. The lines are the best fit to the hyperbolic equation

## SUPPORTING INFORMATION

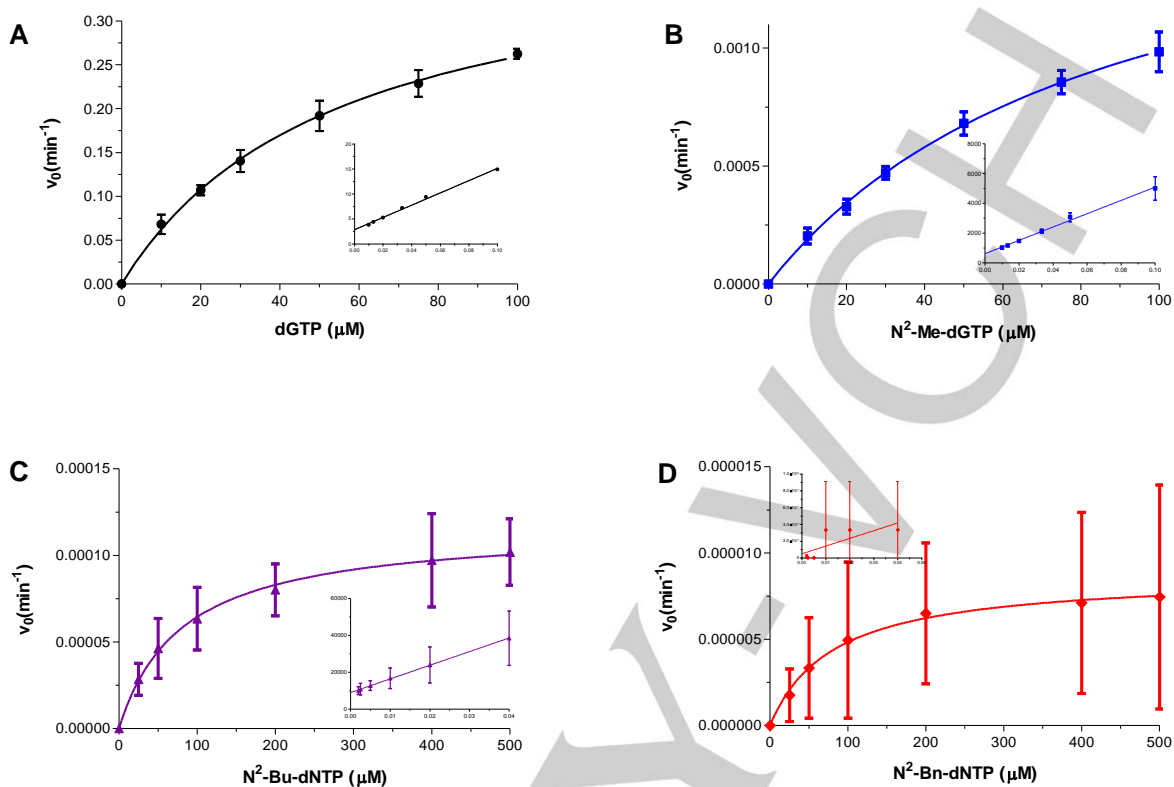

Figure S12. Pol  $\delta$ -catalyzed incorporation of  $N^2$ -alkyl-dGTP opposite dC. The reaction was carried out with 0.1 nM pol  $\delta$ , 10 nM PCNA, 1 nM DNA, with various concentrations of (A) dGTP, (B)  $N^2$ -Me-dGTP, (C)  $N^2$ -Bu-dGTP, and (D)  $N^2$ -Bn-dGTP. The lines are the best fit to the hyperbolic equation. The inserts are the Lineweaver-Burk plots.

## SUPPORTING INFORMATION

TES-51- N2-butyl-dG  
 1H NMR 2/11/16

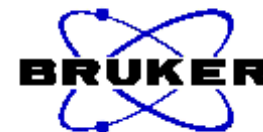

```

NAME      TES16
EXPNO     46
PROCNO    1
Date_     20160212
Time      13.54
INSTRUM   spect
PROBHD    5 mm PABBO BB-
PULPROG   zg30
TD        65536
SOLVENT   DMSO
NS        128
DS        2
SWH       9236.453 Hz
FIDRES    0.140937 Hz
AQ        3.5477321 sec
RG        228
DW        54.133 usec
DE        6.50 usec
TE        300.1 K
D1        0.5000000 sec
TD0       1
  
```

```

===== CHANNEL f1 =====
NUC1      1H
P1        9.90 usec
PL1       0.00 dB
PL1W      26.12361908 W
SFO1      500.1323525 MHz
SI        32768
SF        500.1300139 MHz
WDW       EM
SSB       0
LB        0.30 Hz
GB        0
PC        4.00
  
```

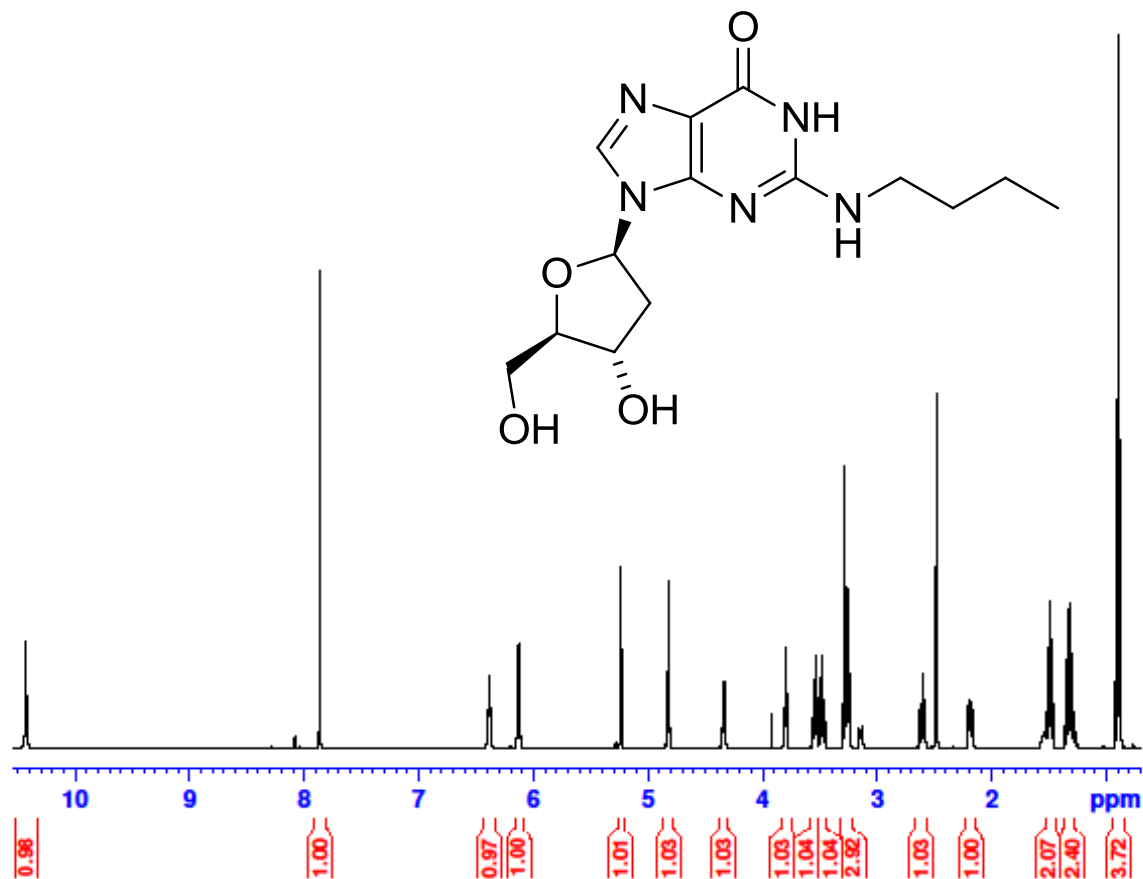

Figure S13. 1H NMR (DMSO-d6) N2-butyl-2'-deoxyguanosine.

## SUPPORTING INFORMATION

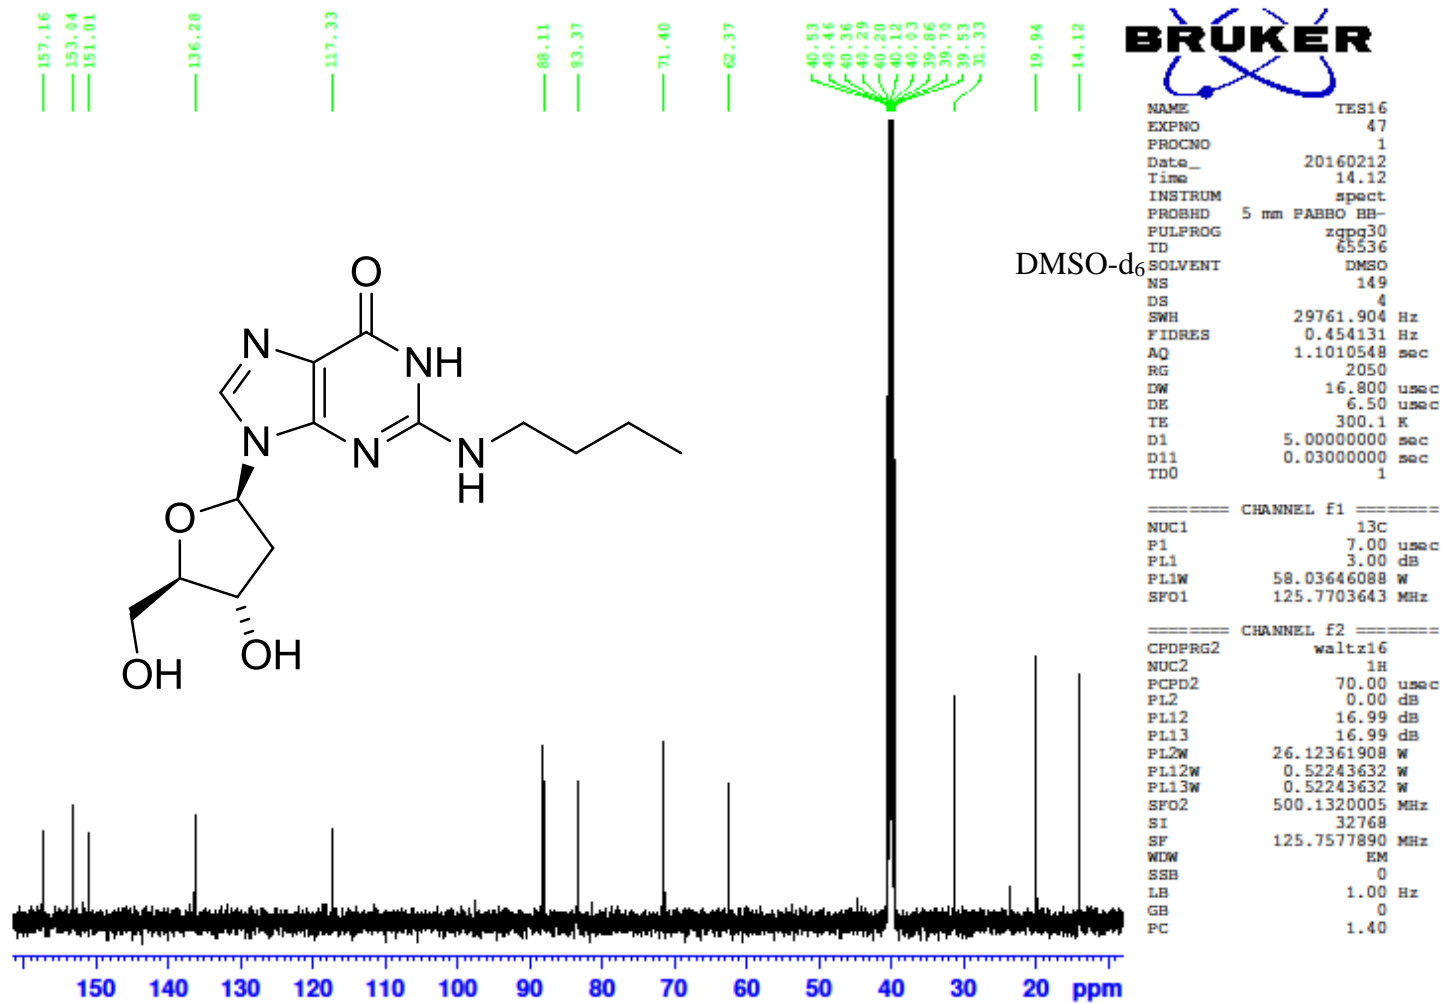Figure S14. <sup>13</sup>C NMR (DMSO-d<sub>6</sub>) *N*<sup>2</sup>-butyl-2'-deoxyguanosine.



## SUPPORTING INFORMATION

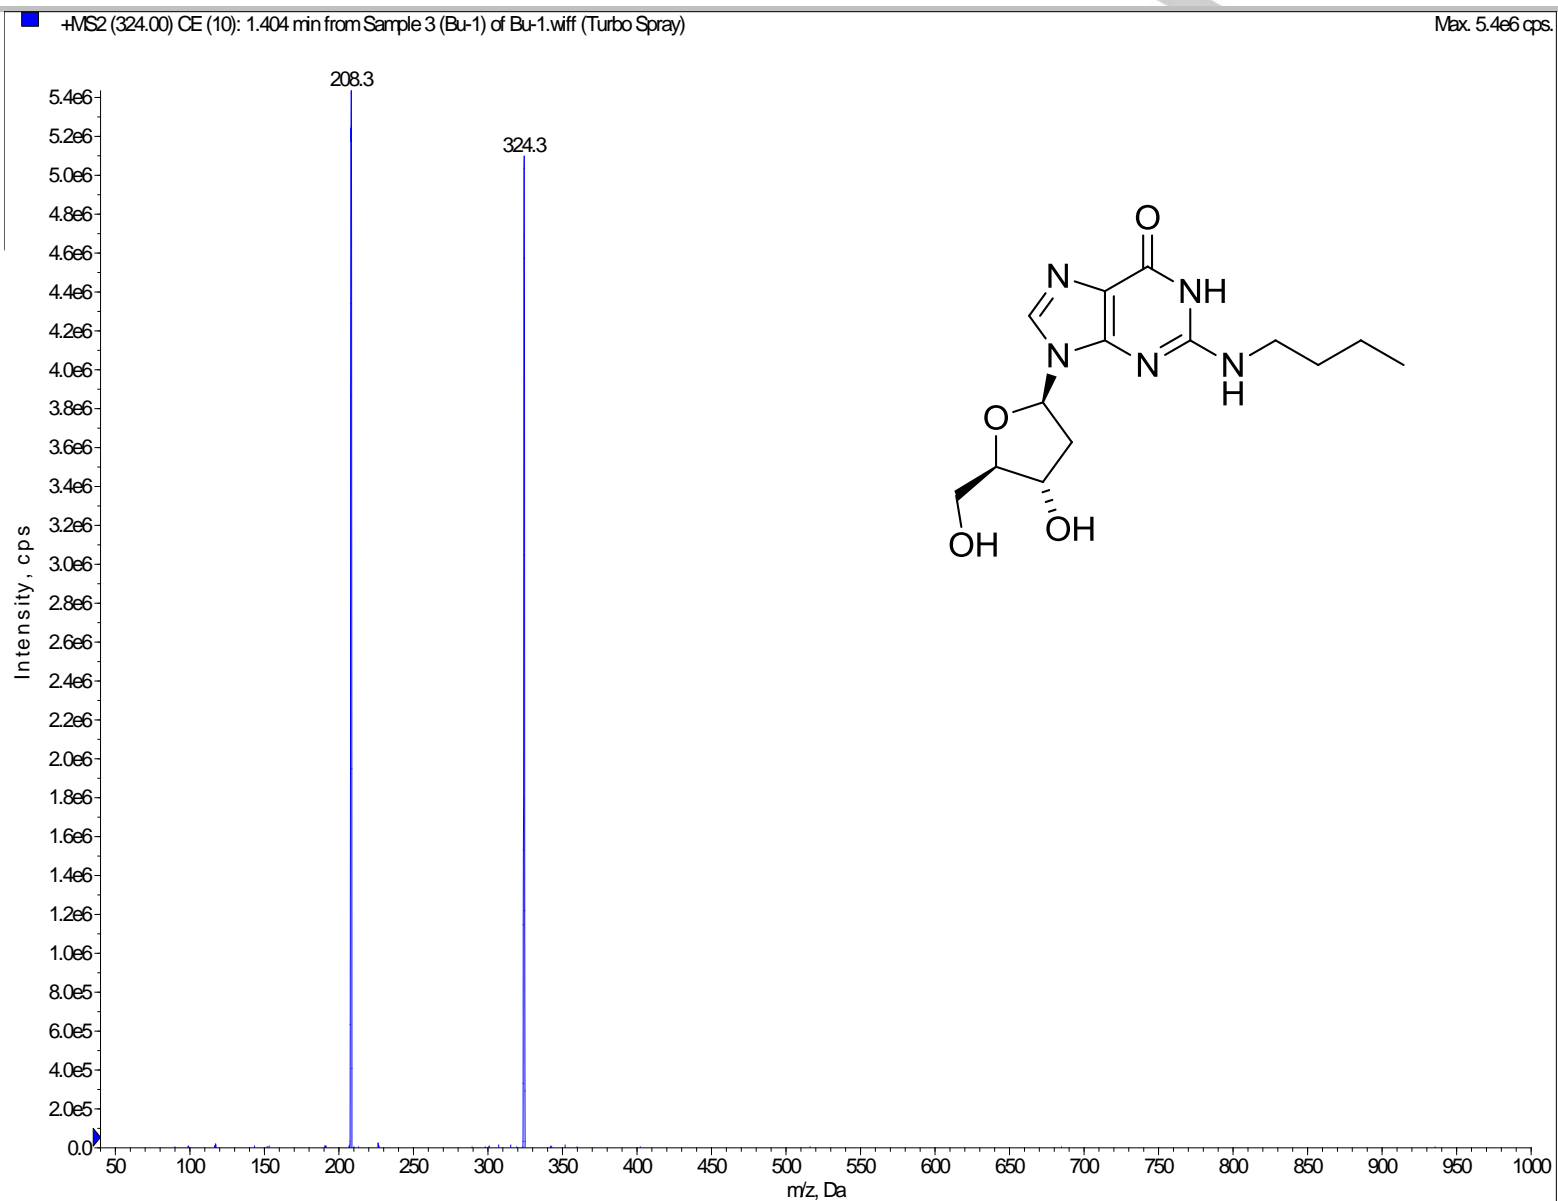Figure S15. ESI MS N<sup>2</sup>-butyl-dG

## SUPPORTING INFORMATION

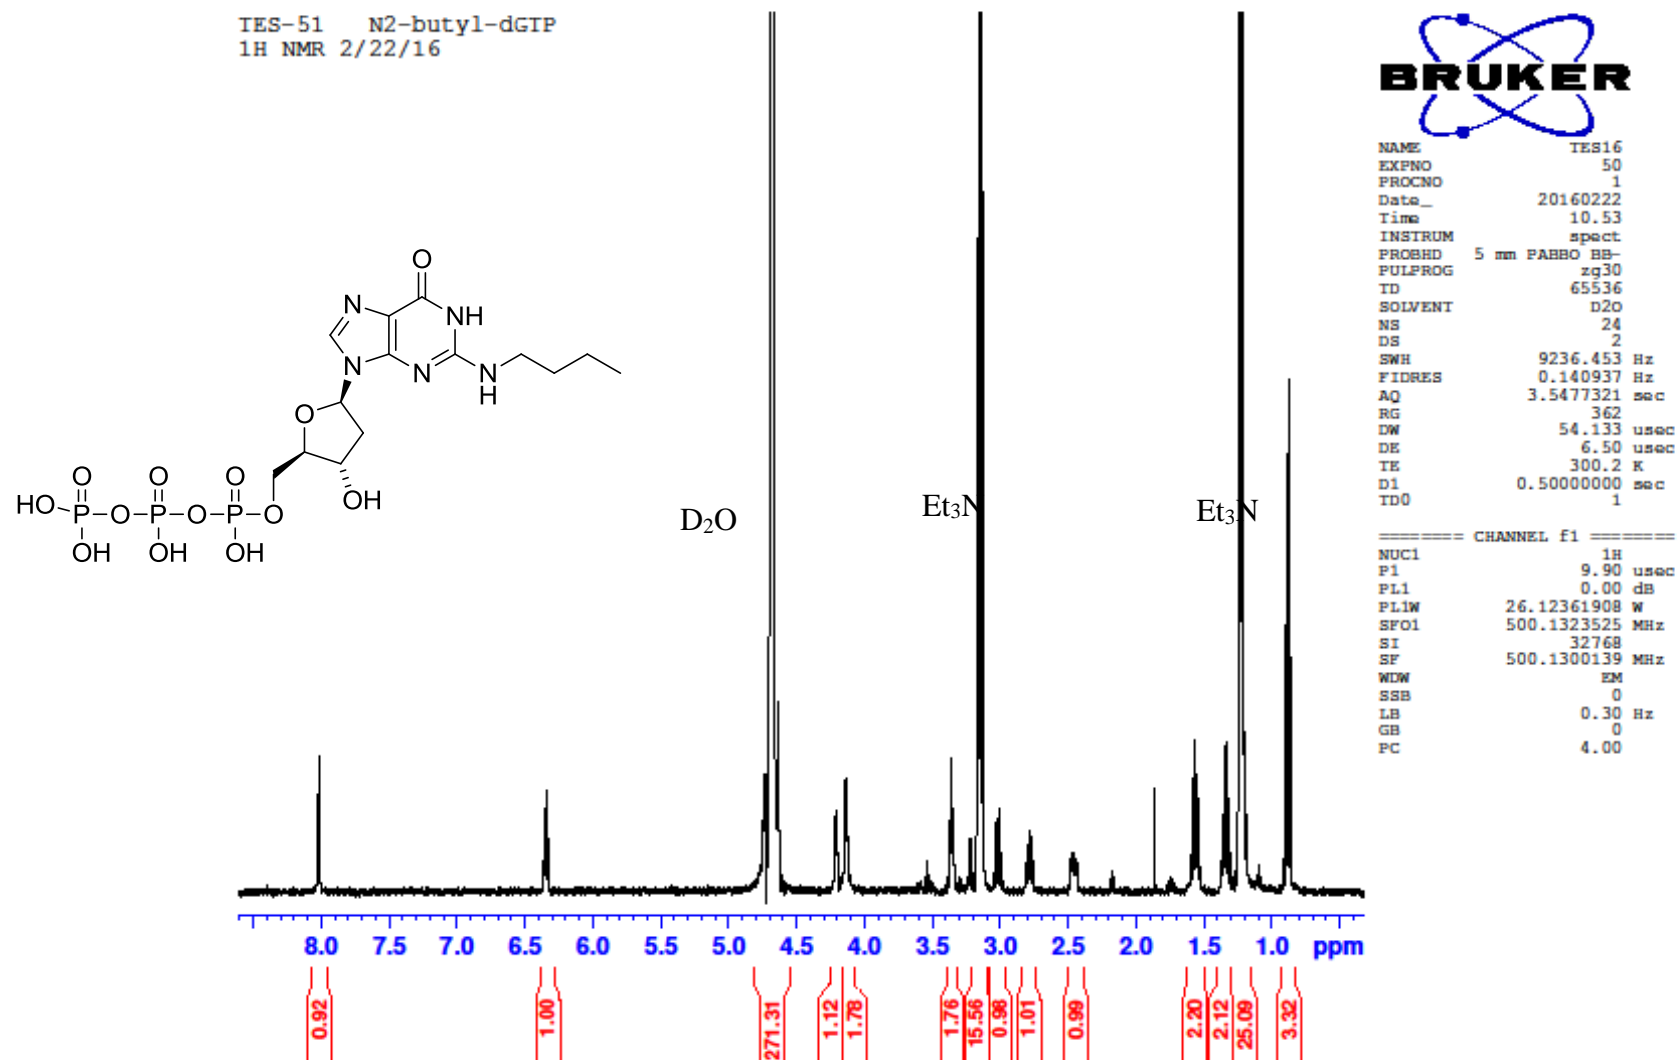Figure S16. <sup>1</sup>H NMR (D<sub>2</sub>O) N<sup>2</sup>-butyl-dGTP

IES-51-037 N2-dGTP  
31P- BBO probe. 01/14/16

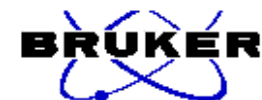

```

NAME          TES1
EXPNO         1
PROCNO
Date_         2016011
Time         13.4
INSTRUM      spec
PROBHD       5 mm PABBO BB
PULPROG      zgpg3
TD           6553
SOLVENT      D2
NS           46
DS
SWH          81521.74
FIDRES      1.24392
AQ          0.402004
RG          205
DW          6.13
DE          6.5
TE          300.
D1          2.0000000
D11         0.0300000
TD0
  
```

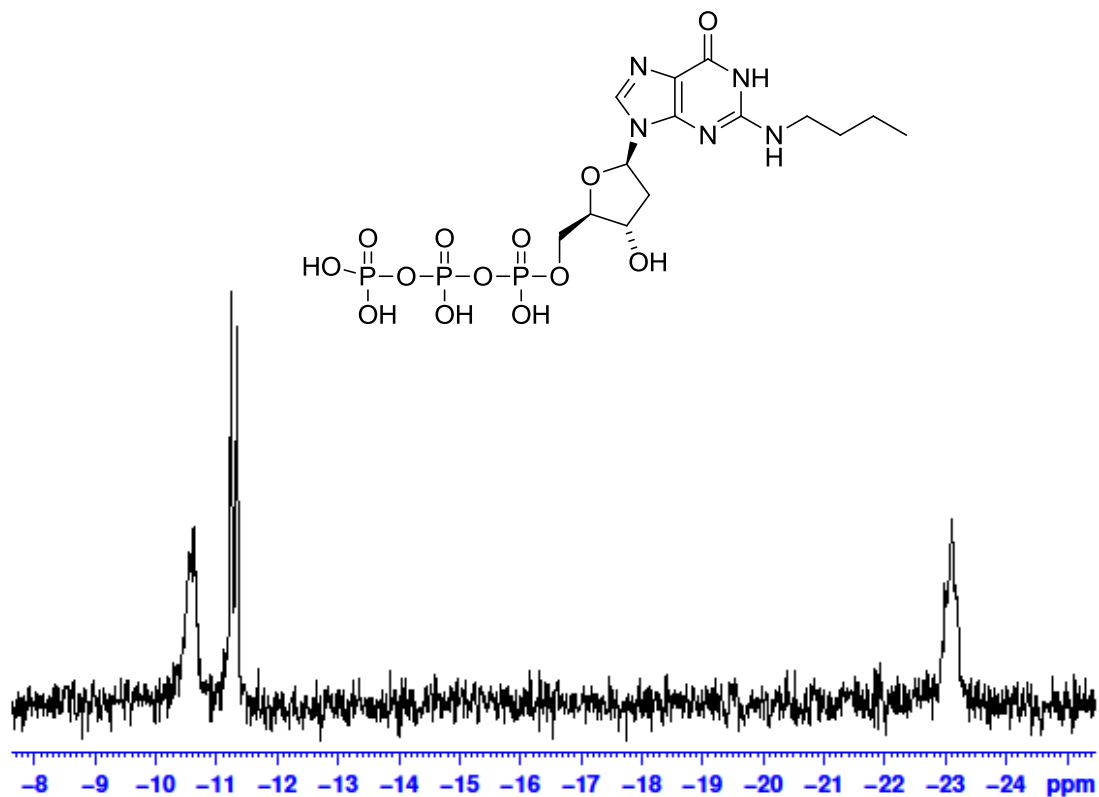

Figure S17. <sup>31</sup>P NMR (D<sub>2</sub>O) N<sup>2</sup>-butyl-dGTP

## SUPPORTING INFORMATION

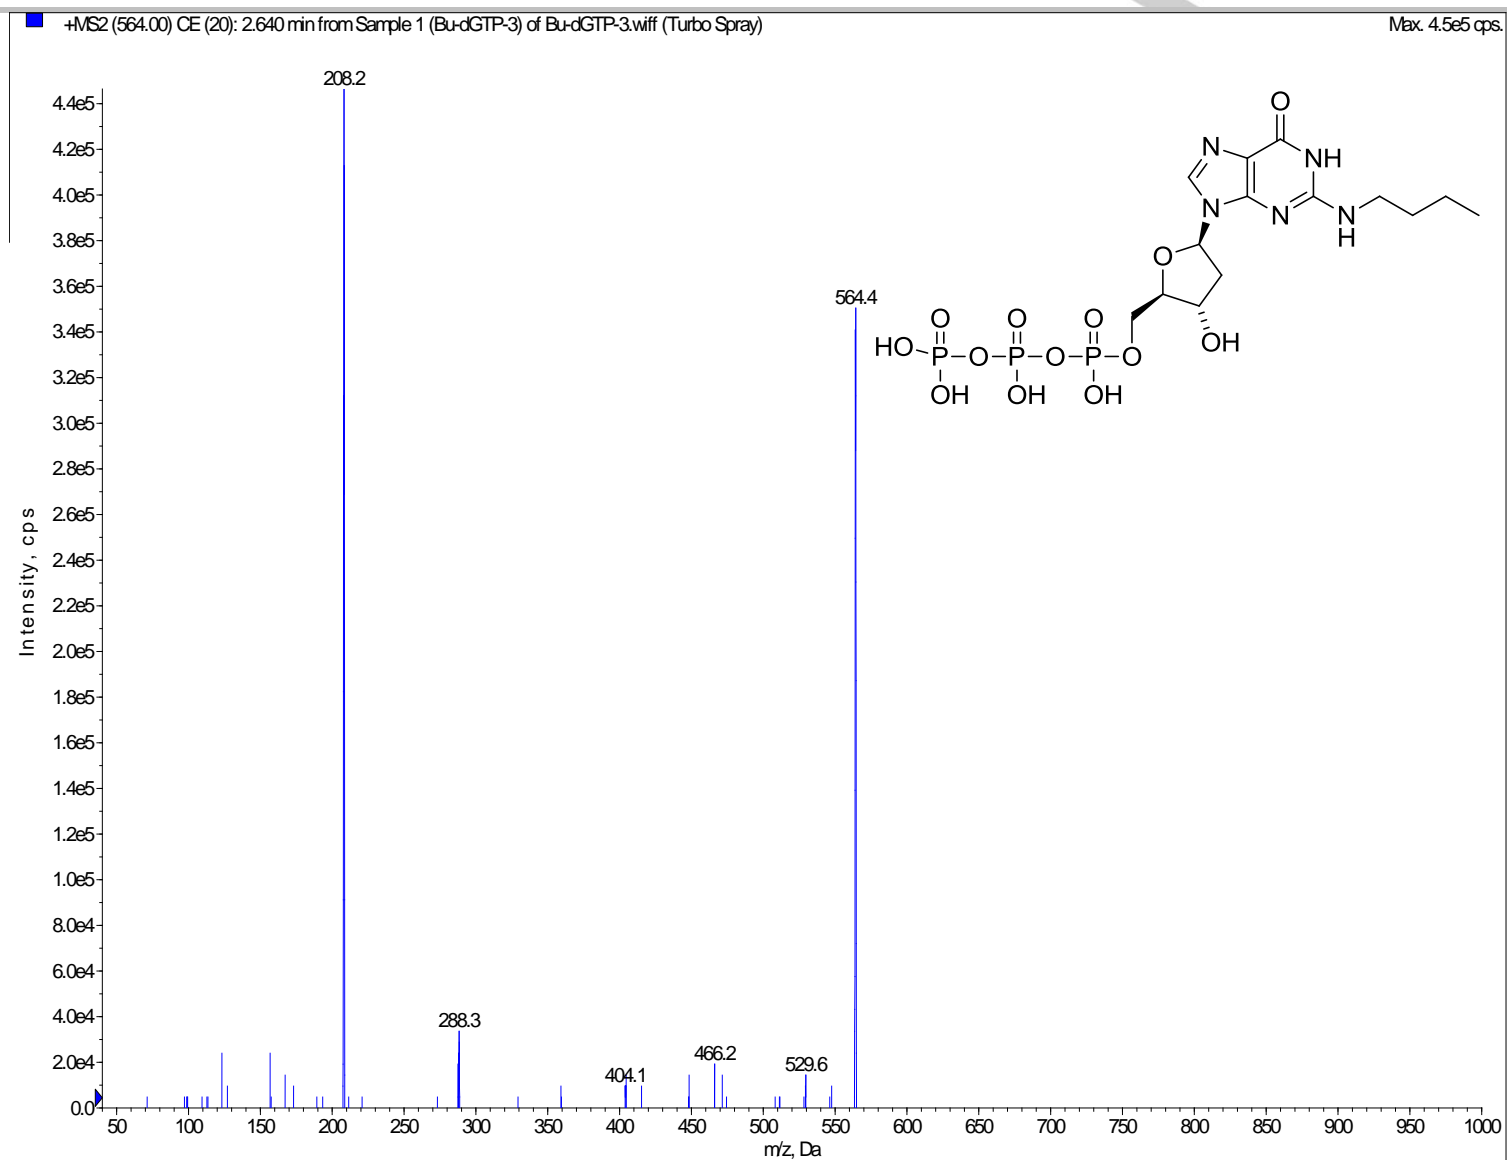Figure S18. ESI MS  $N^2$ -butyl-dGTP

## SUPPORTING INFORMATION

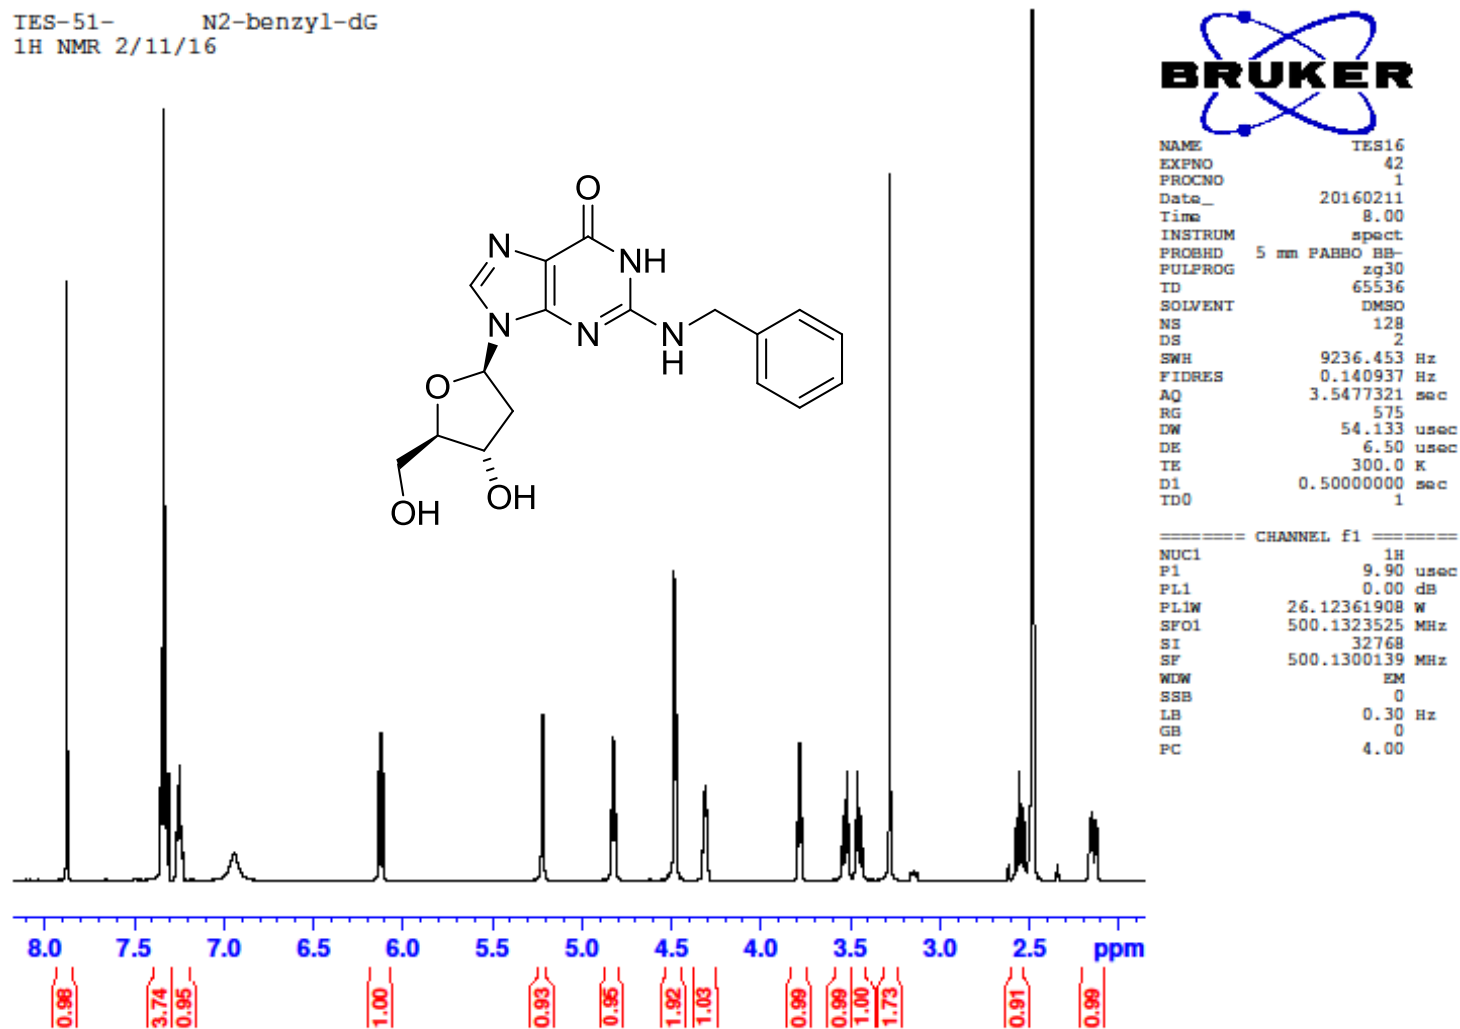Figure S19.  $^1\text{H}$  NMR ( $\text{DMSO-d}_6$ ) of  $N^2$ -benzyl-2'-deoxyguanosine.

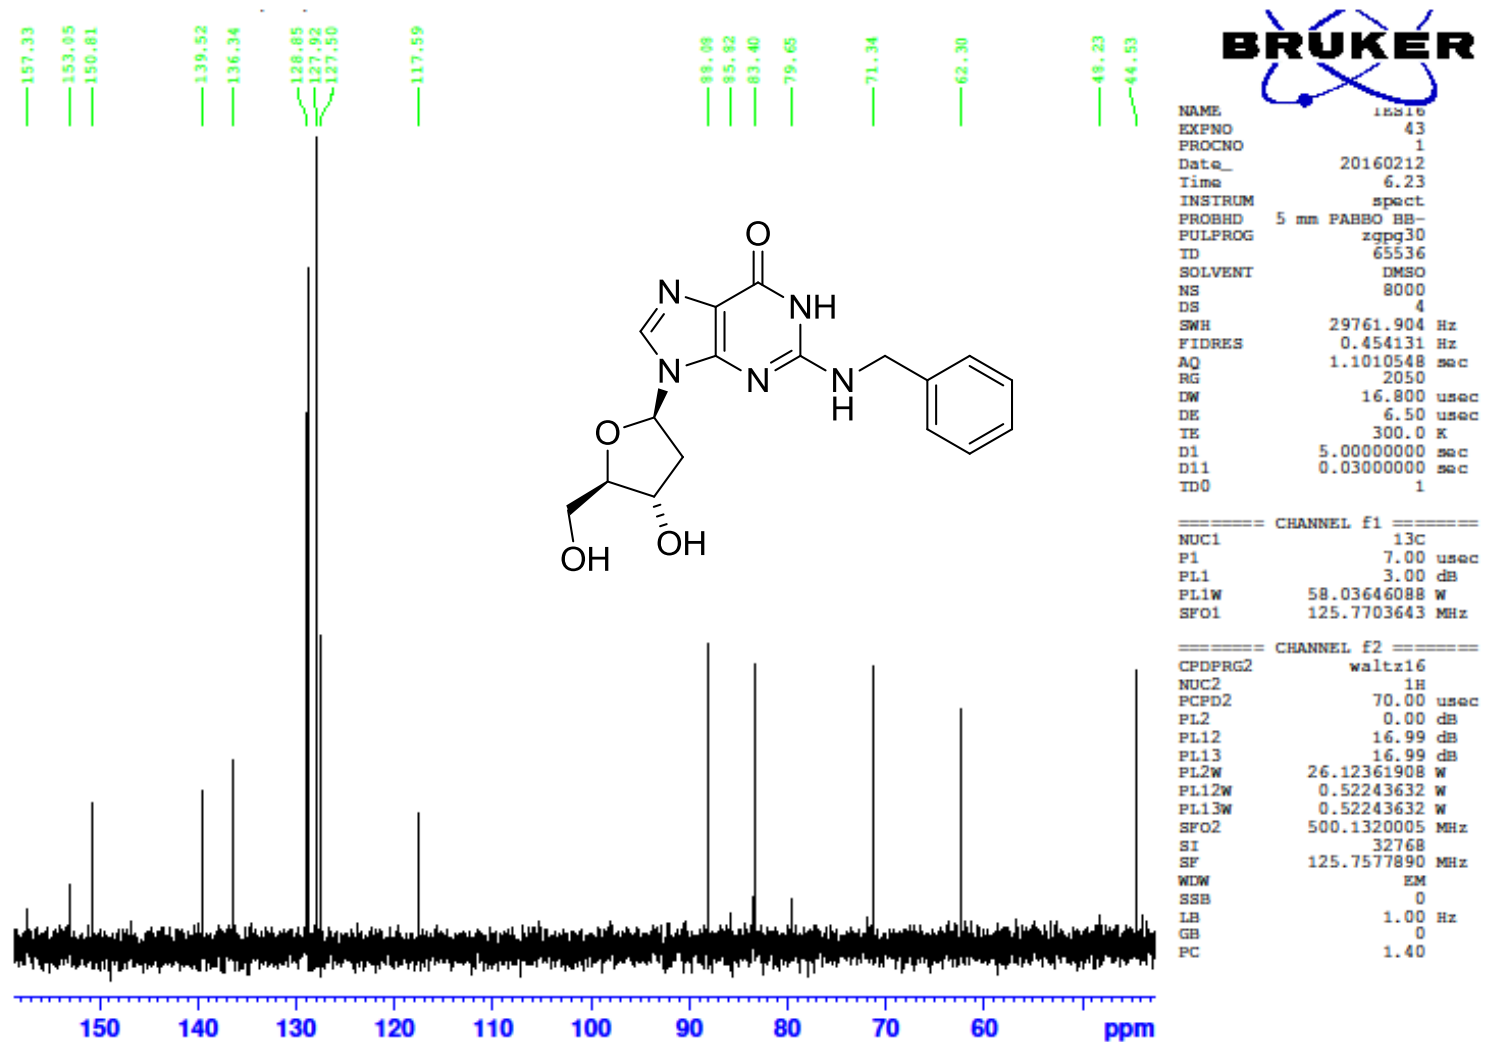Figure S20.  $^{13}\text{C}$  NMR (DMSO- $d_6$ )  $N^2$ -benzyl-2'-deoxyguanosine.



## SUPPORTING INFORMATION

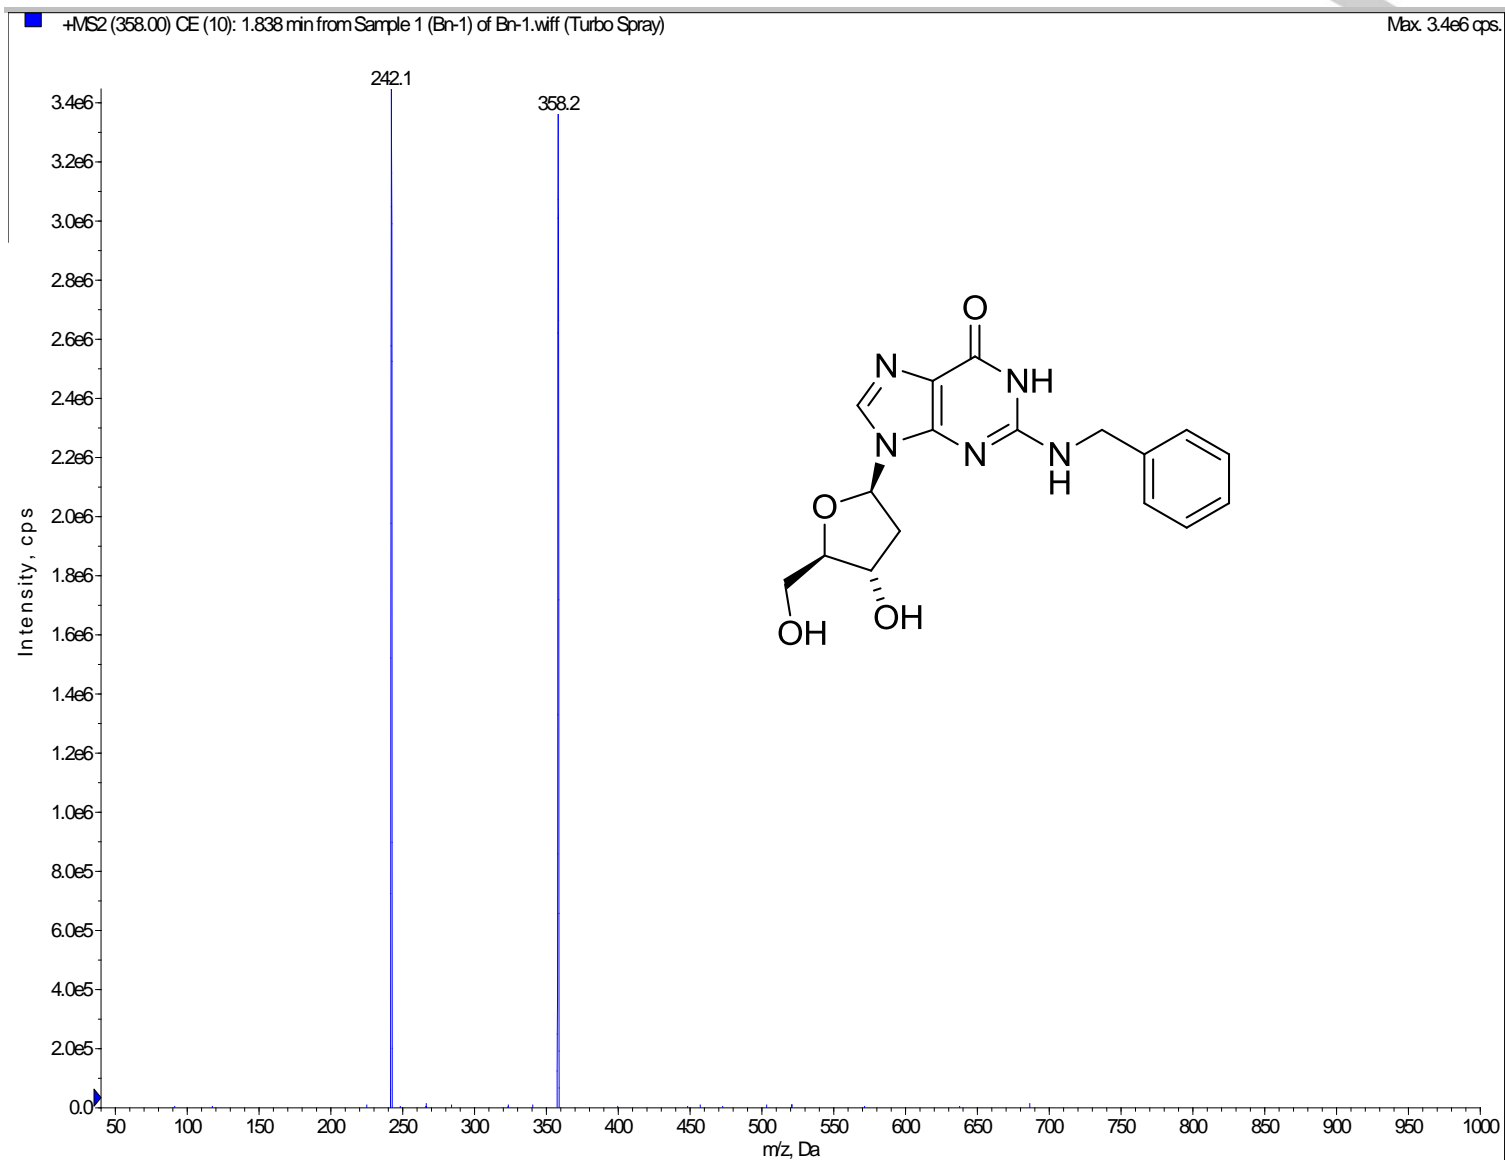Figure S21. ESI MS N<sup>2</sup>-Bn-dG

IES-51- N2-benzyl-dG  
1H NMR 2/15/16

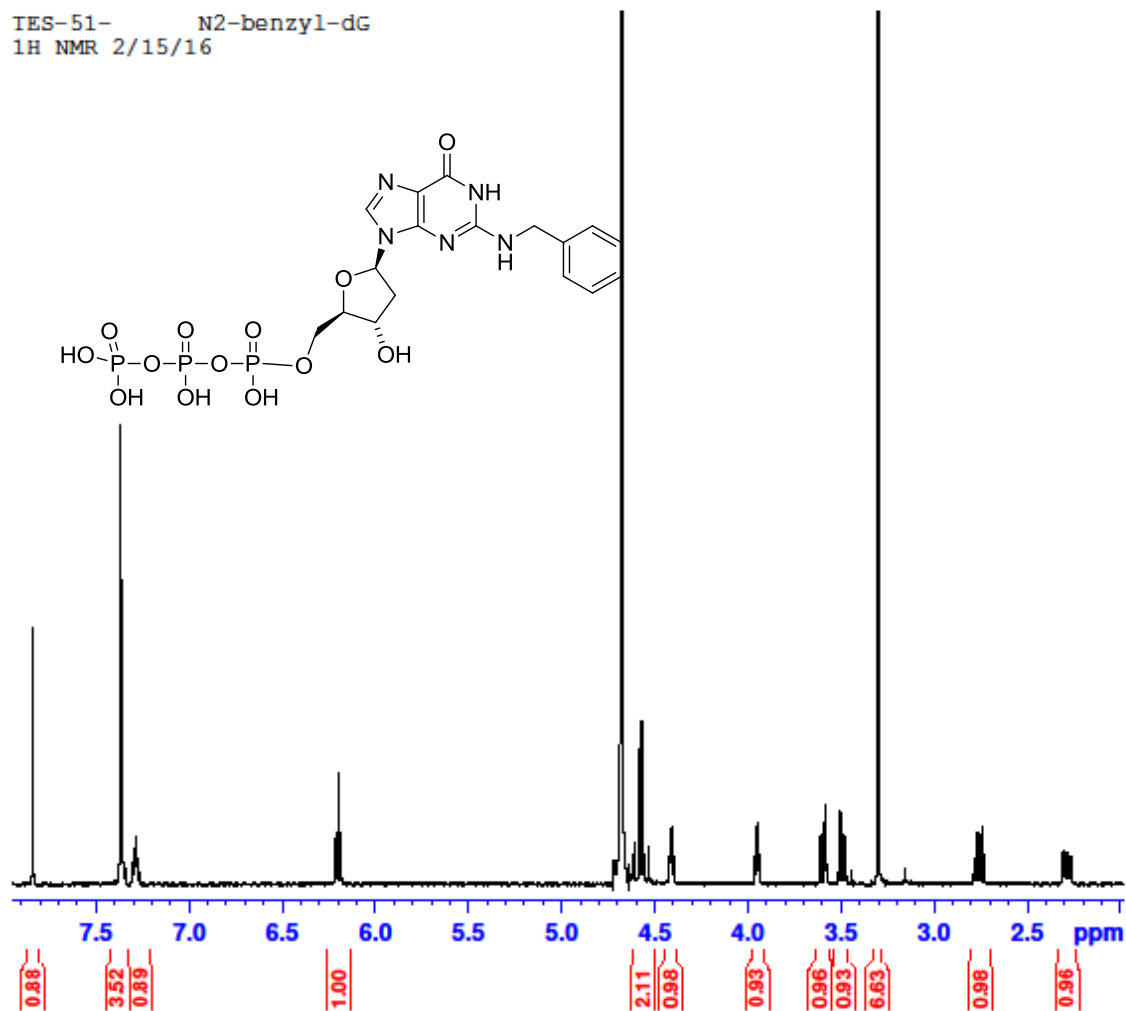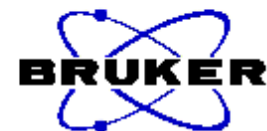

```
NAME          TES16
EXPNO         48
PROCNO        1
Date_         20160215
Time          12.33
INSTRUM       spect
PROBHD        5 mm PABBO BB-
PULPROG       zg30
ID            65536
SOLVENT       D2O
NS            64
DS            2
SWH           9236.453 Hz
FIDRES        0.140937 Hz
AQ            3.5477321 sec
RG            228
DW            54.133 usec
DE            6.50 usec
TE            300.2 K
D1            0.50000000 sec
TD0           1
```

```
==== CHANNEL f1 =====
NUC1           1H
P1             9.90 usec
PL1            0.00 dB
PL1W           26.12361908 W
SFO1           500.1323525 MHz
SI             32768
SF             500.1300139 MHz
WDW            EM
SSB            0
LB             0.30 Hz
GB             0
PC             4.00
```

Figure S22. <sup>1</sup>H NMR (D<sub>2</sub>O) N<sup>2</sup>-benzyl-dGTP

## SUPPORTING INFORMATION

TES-50-93  
31P- BBO probe. 12/17/15

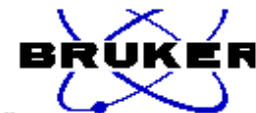

```

NAME          TES10
EXPNO         77
PROCNO        1
Date_         20150319
Time          22.06
INSTRUM       spect
PROBHD        5 mm PABBO BB-
PULPROG       zgpg30
TD            65536
SOLVENT       D2O
NS            7626
DS            4
SWH           81521.742 |
FIDRES        1.243923 |
AQ            0.4020041 |
RG            2050
DW            6.133 |
DE            6.50 |
TE            300.0 |
D1            2.00000000 |
D11           0.03000000 |
TD0           1
  
```

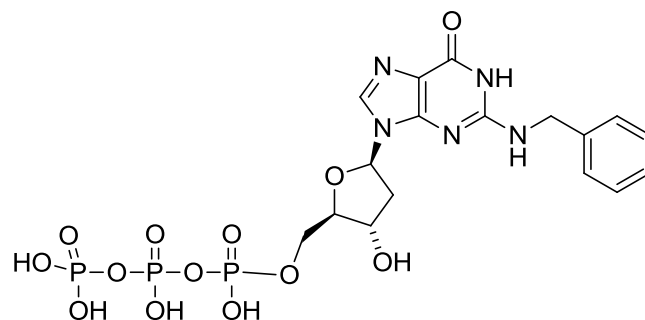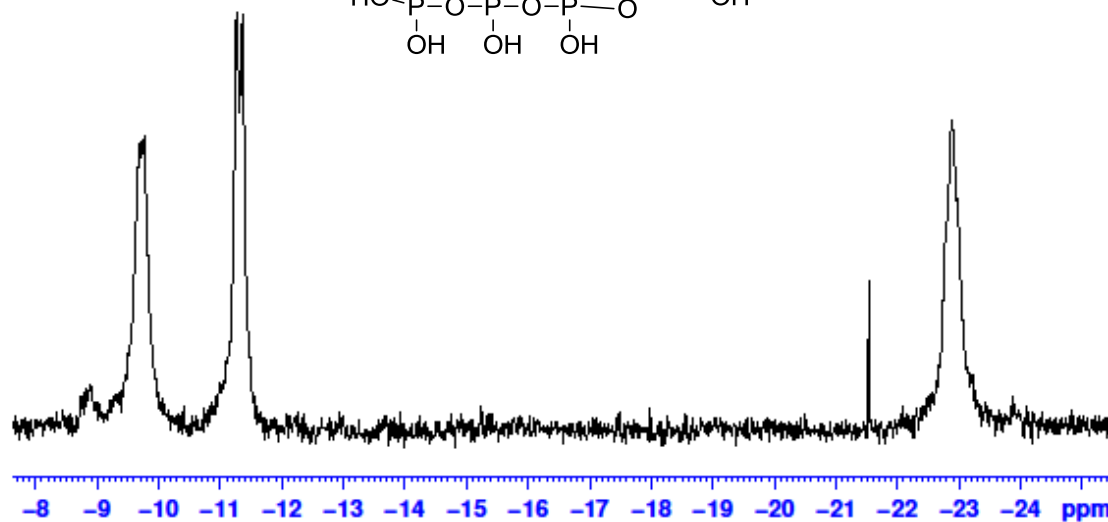

```

===== CHANNEL f1 =====
NUC1          31P
P1            10.50 |
PL1           3.00 |
PL1W          50.35701752 |
SFO1          202.4564198 |
  
```

```

===== CHANNEL f2 =====
CPDPRG2       waltz16
NUC2           1H
PCPD2         70.00 |
PL2           0.00 |
PL12          16.99 |
PL13          16.99 |
PL2W          26.12361908 |
PL12W         0.52243632 |
PL13W         0.52243632 |
SFO2          500.1320005 |
SI            32768
SF            202.4563350 |
WDW           EM
SSB           0
LB            1.00 |
GB            0
PC            1.40
  
```

Figure S23.  $^{31}\text{P}$  NMR ( $\text{D}_2\text{O}$ )  $N^2$ -benzyl-dGTP

## SUPPORTING INFORMATION

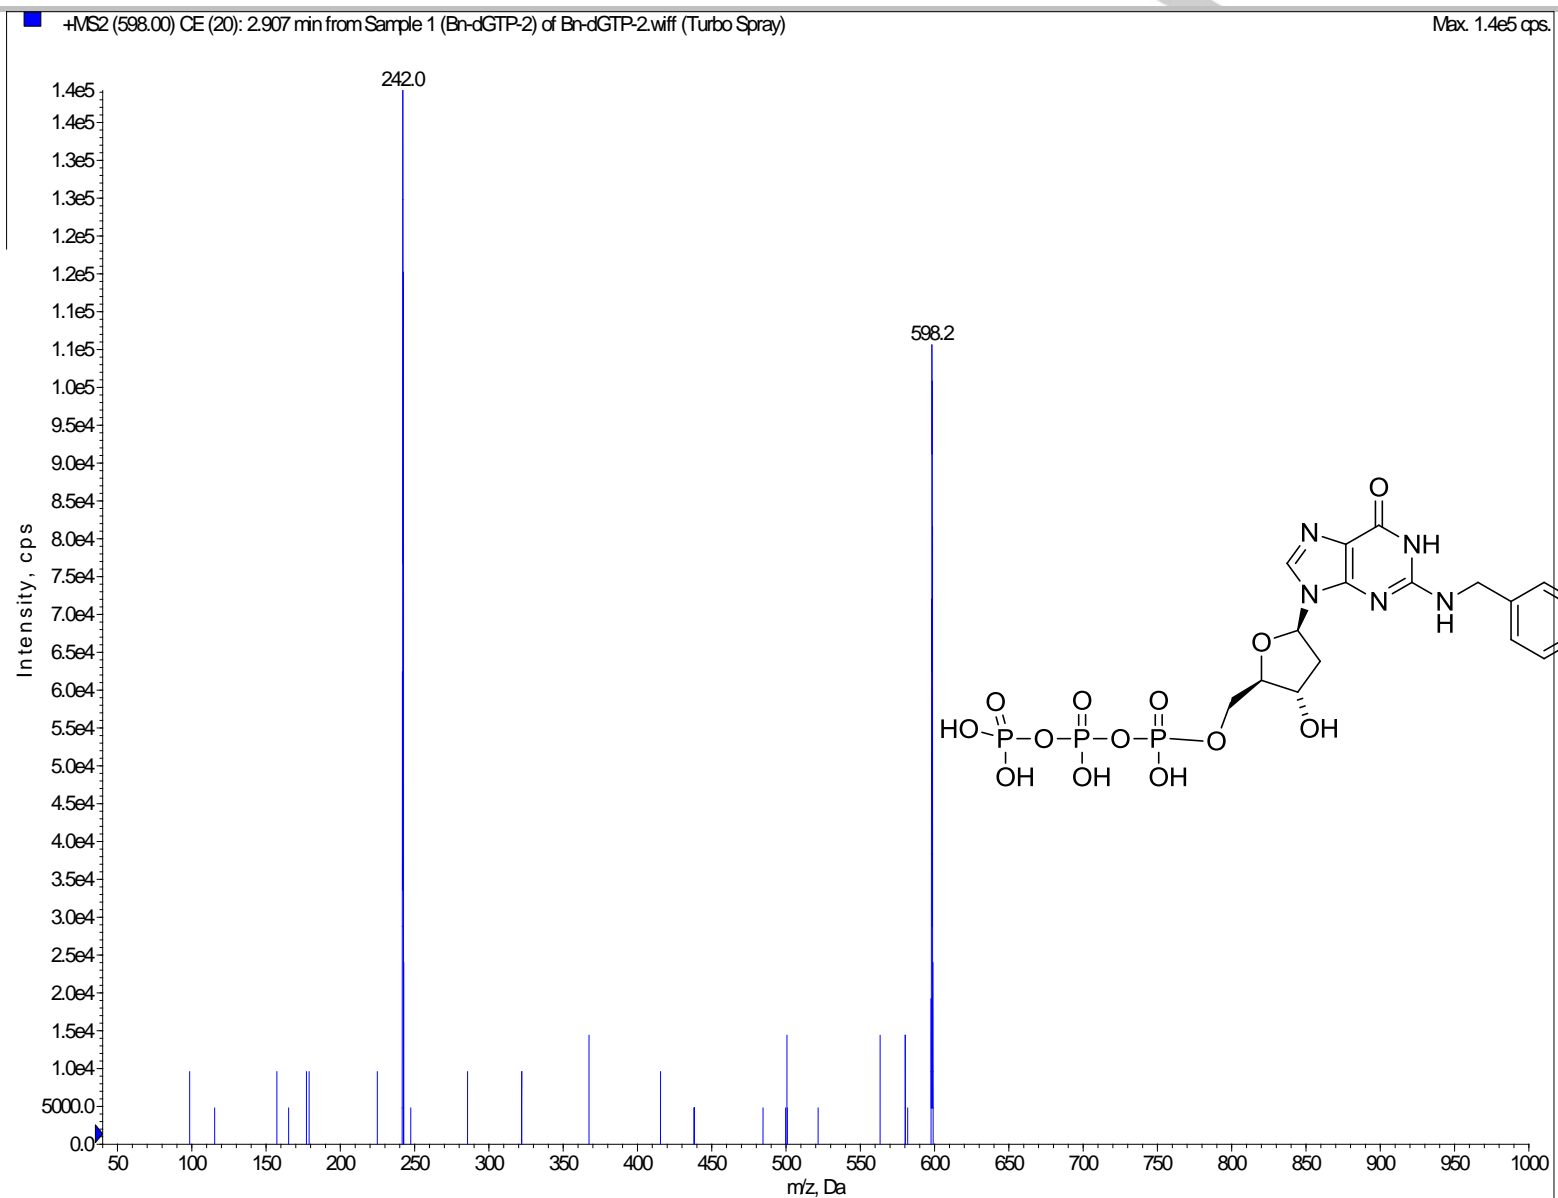Figure S24. ESI MS  $N^2$ -benzyl-dGTP

## SUPPORTING INFORMATION

TES-51-81.2 tBDMS-dG-O6-EtTMS  
 1H NMR 6/24/16.

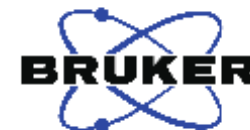

Current Data Parameters  
 NAME TES16  
 EXPNO 167  
 PROCNO 1

F2 - Acquisition Parameters  
 Date\_ 20160624  
 Time 14.13  
 INSTRUM spect  
 PROBHD 5 mm PABBO BB-  
 PULPROG zg30  
 ID 65536  
 SOLVENT CDCl3  
 NS 32  
 DS 2  
 SWH 9236.453 Hz  
 FIDRES 0.140937 Hz  
 AQ 3.5476820 sec  
 RG 50.8  
 DW 54.133 usec  
 DE 6.50 usec  
 TE 299.8 K  
 D1 0.50000000 sec  
 TD0 1

==== CHANNEL f1 =====  
 NUC1 1H  
 P1 9.90 usec  
 PL1 0 dB  
 PL1W 26.12361908 W  
 SFO1 500.1323525 MHz

F2 - Processing parameters  
 SI 32768  
 SF 500.1300139 MHz  
 WDW EM  
 SSB 0  
 LB 0.30 Hz  
 GB 0  
 PC 4.00

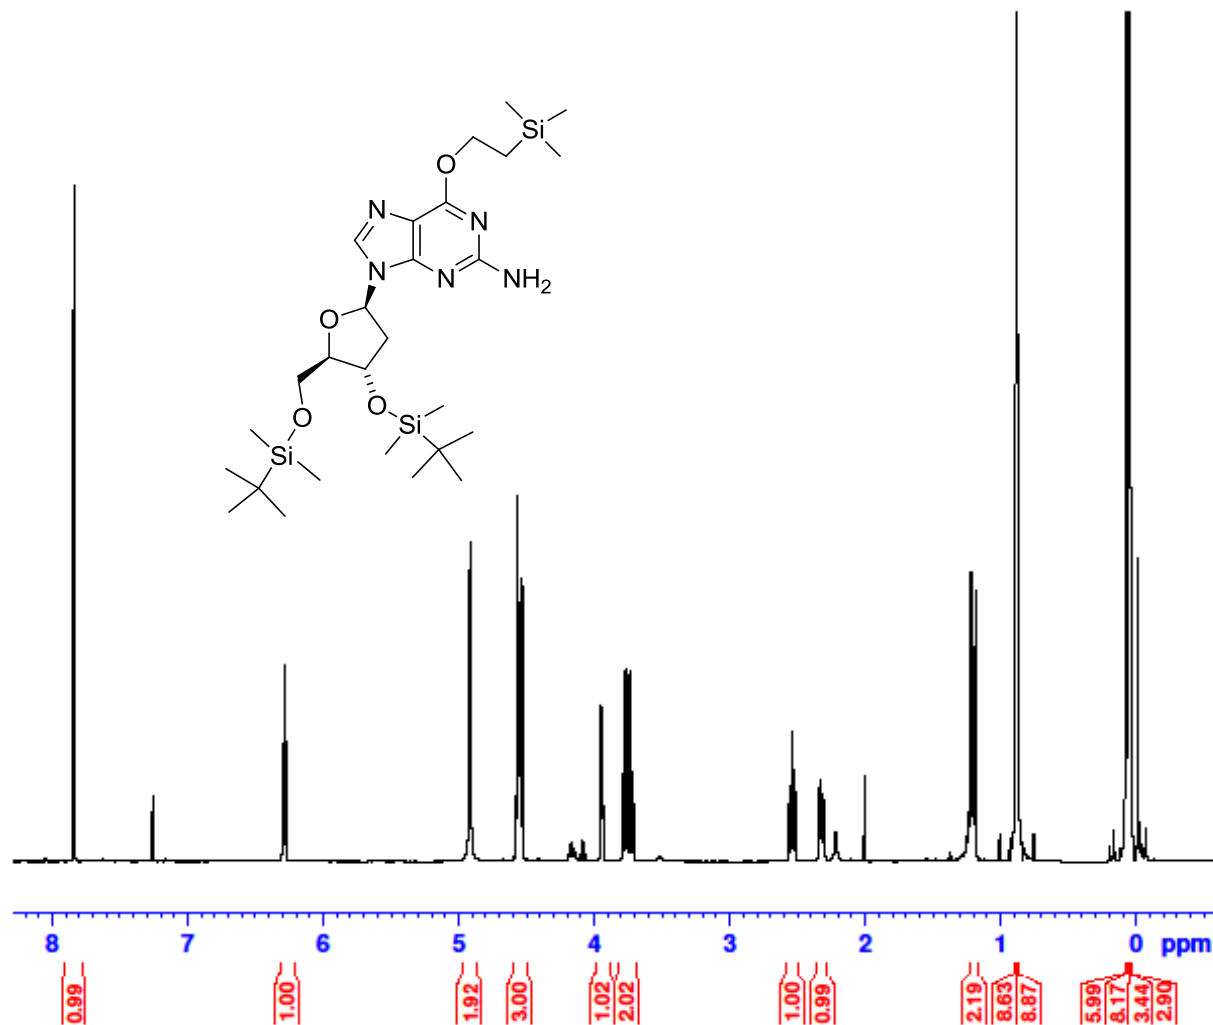

Figure S25. <sup>1</sup>H NMR (CDCl<sub>3</sub>) 3',5'-O-Bis(*tert*-butyldimethylsilyl)-*O*<sup>6</sup>-trimethylsilylethyl-2'-deoxy-guanosine.

## SUPPORTING INFORMATION

IES-51-81.2 tBDMS-dG-O6-EtTMS  
C-13 NMR BBO. 06/24/2016

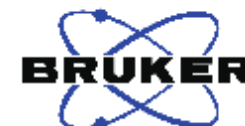

Current Data Parameters  
NAME IES16  
EXPNO 168  
PROCNO 1

F2 - Acquisition Parameters  
Date\_ 20160624  
Time 14.17  
INSTRUM spect  
PROBHD 5 mm PABBO BB-  
PULPROG zgpg30  
ID 65536  
SOLVENT CDCl3  
NS 53  
DS 4  
SWH 29761.904 Hz  
FIDRES 0.454131 Hz  
AQ 1.1010048 sec  
RG 2050  
DW 16.800 usec  
DE 6.50 usec  
TE 300.2 K  
D1 2.00000000 sec  
D11 0.03000000 sec  
TD0 1

----- CHANNEL f1 -----  
NUC1 13C  
P1 7.00 usec  
PL1 3.00 dB  
PL1W 58.03646088 W  
SFO1 125.7703643 MHz

----- CHANNEL F2 -----  
CPDPRG[2] waltz16  
NUC2 1H  
PCPD2 70.00 usec  
PL2 0 dB  
PL12 16.99 dB  
PL13 16.99 dB  
PL2W 26.12361908 W  
PL12W 0.52243632 W  
PL13W 0.52243632 W  
SFO2 500.1320005 MHz

F2 - Processing parameters  
SI 32768  
SF 125.7577890 MHz  
WDW EM  
SSB 0  
LB 1.00 Hz  
GB 0  
PC 1.40

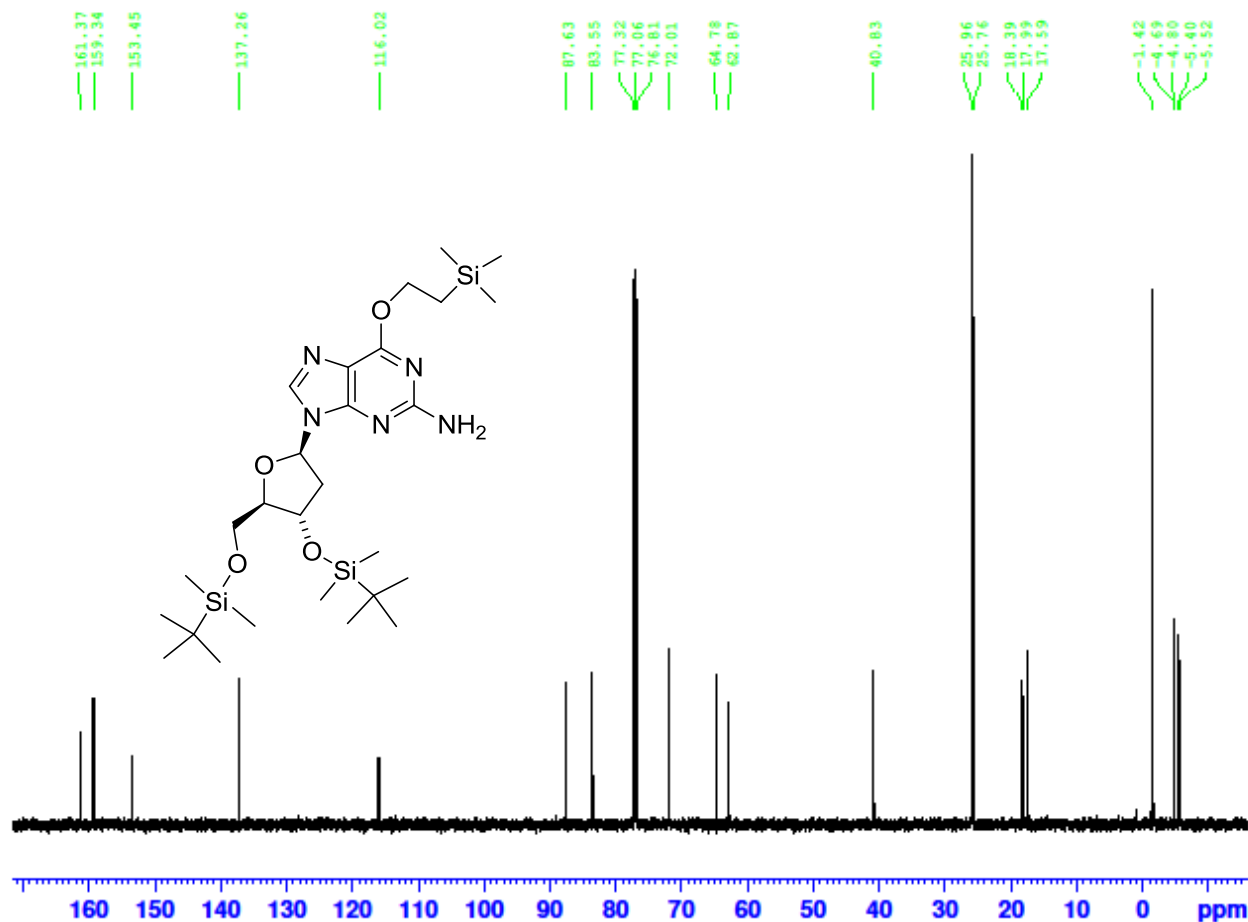

Figure S26.  $^{13}\text{C}$  NMR ( $\text{CDCl}_3$ ) 3',5'-O-Bis(*tert*-butyldimethylsilyl)- $O^6$ -trimethylsilylethyl-2'-deoxy-guanosine.

## SUPPORTING INFORMATION

TES-51-81.2 tBDMS-dG-2-F-O6-EtIMS + F .  
 1H NMR 6/29/16.

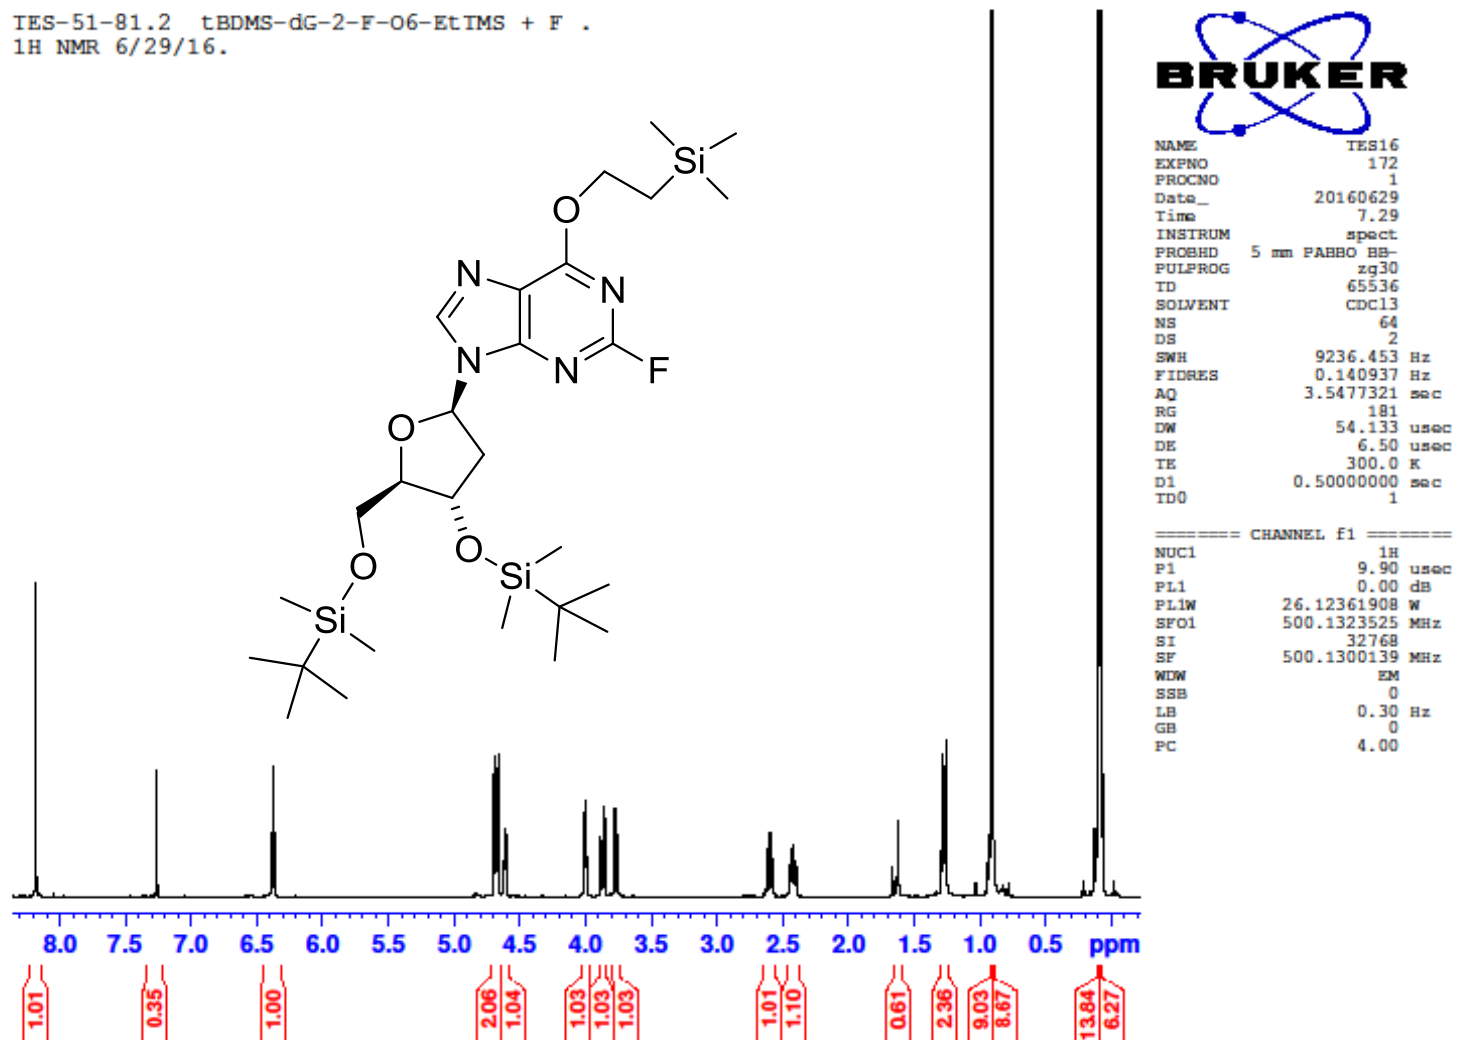

Figure S27.  $^1\text{H}$  NMR ( $\text{CDCl}_3$ ) 3',5'-O-Bis(*tert*-butyldimethylsilyl)- $O^6$ -trimethylsilyl ethyl-2'-deoxy-2-fluoroguanosine.

## SUPPORTING INFORMATION

C-13 NMR BBO. 05/01/2011

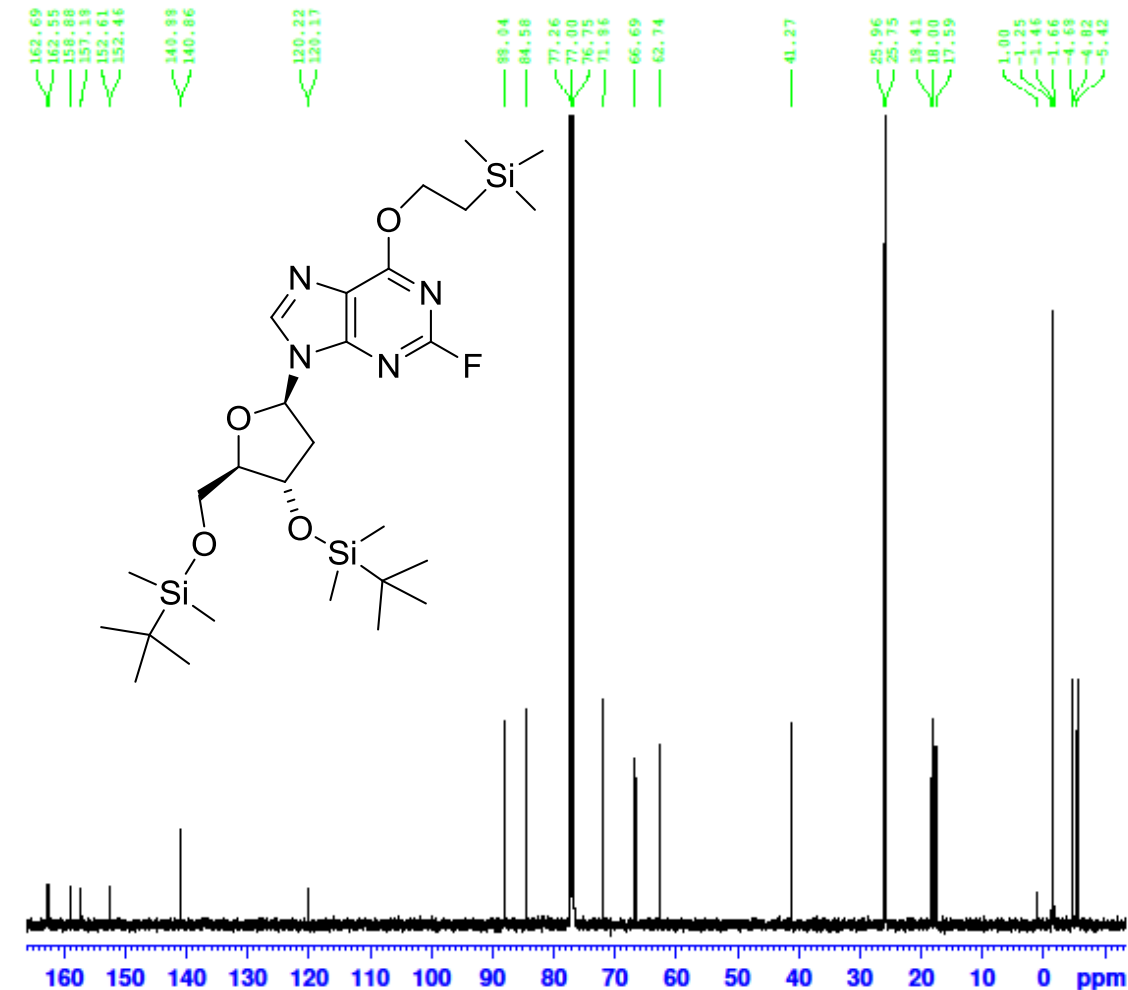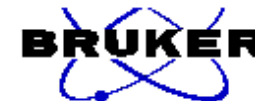

```

NAME      TES16
EXPNO     173
PROCNO    1
Date_     20160629
Time      7.38
INSTRUM   spect
PROBHD    5 mm PABBO BB-
PULPROG   zgpg30
ID        65536
SOLVENT   CDCl3
NS        1590
DS        4
SWH       29761.904 Hz
FIDRES    0.454131 Hz
AQ        1.1010548 sec
RG        2050
DW        16.800 usec
DE        6.50 usec
TE        300.2 K
D1        2.00000000 sec
D11       0.03000000 sec
TD0       1

```

```

===== CHANNEL f1 =====
NUC1      13C
P1        7.00 usec
PL1       3.00 dB
PL1W     58.03646088 W
SFO1     125.7703643 MHz

```

```

===== CHANNEL f2 =====
CPDPRG2   waltz16
NUC2      1H
PCPD2     70.00 usec
PL2       0.00 dB
PL12     16.99 dB
PL13     16.99 dB
PL2W     26.12361908 W
PL12W    0.52243632 W
PL13W    0.52243632 W
SFO2     500.1320005 MHz
SI        32768
SF        125.7577890 MHz
WDW       EM
SSB       0
LB        1.00 Hz
GB        0
PC        1.40

```

Figure S28.  $^{13}\text{C}$  NMR ( $\text{CDCl}_3$ ) 3',5'-O-Bis(*tert*-butyldimethylsilyl)-O<sup>6</sup>-trimethylsilylethyl-2'-deoxy-2-fluoroguanosine



## SUPPORTING INFORMATION

TES-51-87.2 tBDMS-dG-N2-EBn-O6-EtIMS .  
 1H NMR 6/29/16.

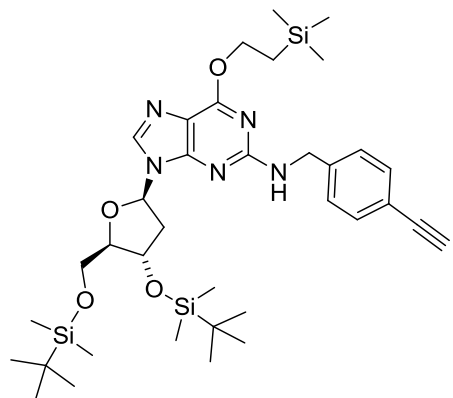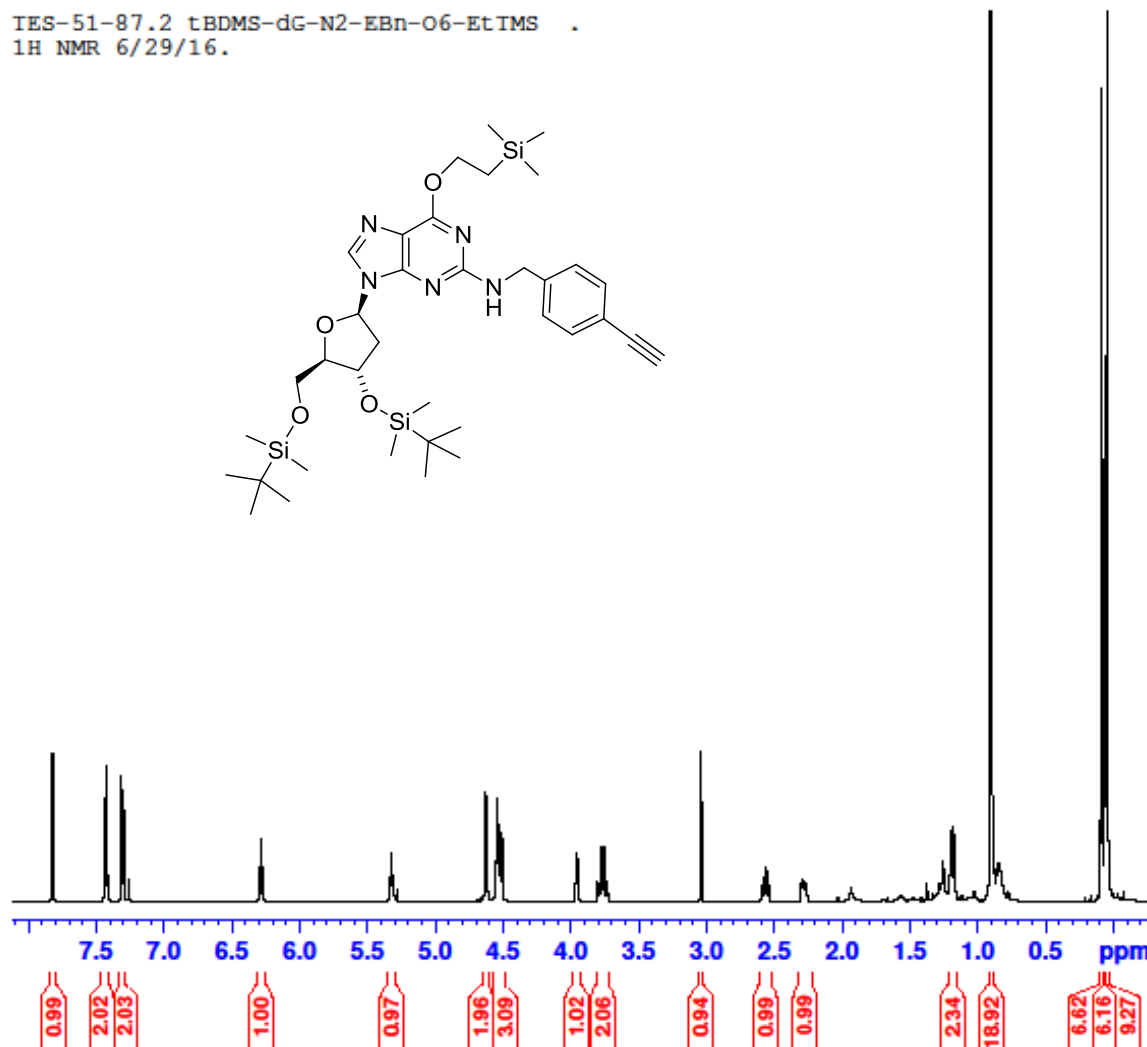

**BRUKER**

|         |                |
|---------|----------------|
| NAME    | TES16          |
| EXPNO   | 176            |
| PROCNO  | 1              |
| Date_   | 20160630       |
| Time    | 12.09          |
| INSTRUM | spect          |
| PROBHD  | 5 mm FAHQ BB-  |
| PULPROG | zg30           |
| TD      | 65536          |
| SOLVENT | CDCl3          |
| NS      | 32             |
| DS      | 2              |
| SWH     | 9236.453 Hz    |
| FIDRES  | 0.140937 Hz    |
| AQ      | 3.5477321 sec  |
| RG      | 64             |
| DW      | 54.133 usec    |
| DE      | 6.50 usec      |
| TE      | 300.1 K        |
| D1      | 0.50000000 sec |
| TD0     | 1              |

  

|                        |                 |
|------------------------|-----------------|
| ===== CHANNEL f1 ===== |                 |
| NUC1                   | 1H              |
| P1                     | 9.90 usec       |
| PL1                    | 0.00 dB         |
| PL1W                   | 26.12361908 W   |
| SFO1                   | 500.1323525 MHz |
| SI                     | 32768           |
| SF                     | 500.1300139 MHz |
| WDW                    | EM              |
| SSB                    | 0               |
| LB                     | 0.30 Hz         |
| GB                     | 0               |
| PC                     | 4.00            |

Figure S29. <sup>1</sup>H NMR (CDCl<sub>3</sub>) Bis(*tert*-butyldimethylsilyl)-O<sup>6</sup>-trimethylsilylethyl-N<sup>2</sup>-*p*-ethynylbenzyl-2'-deoxy-guanosine

## SUPPORTING INFORMATION

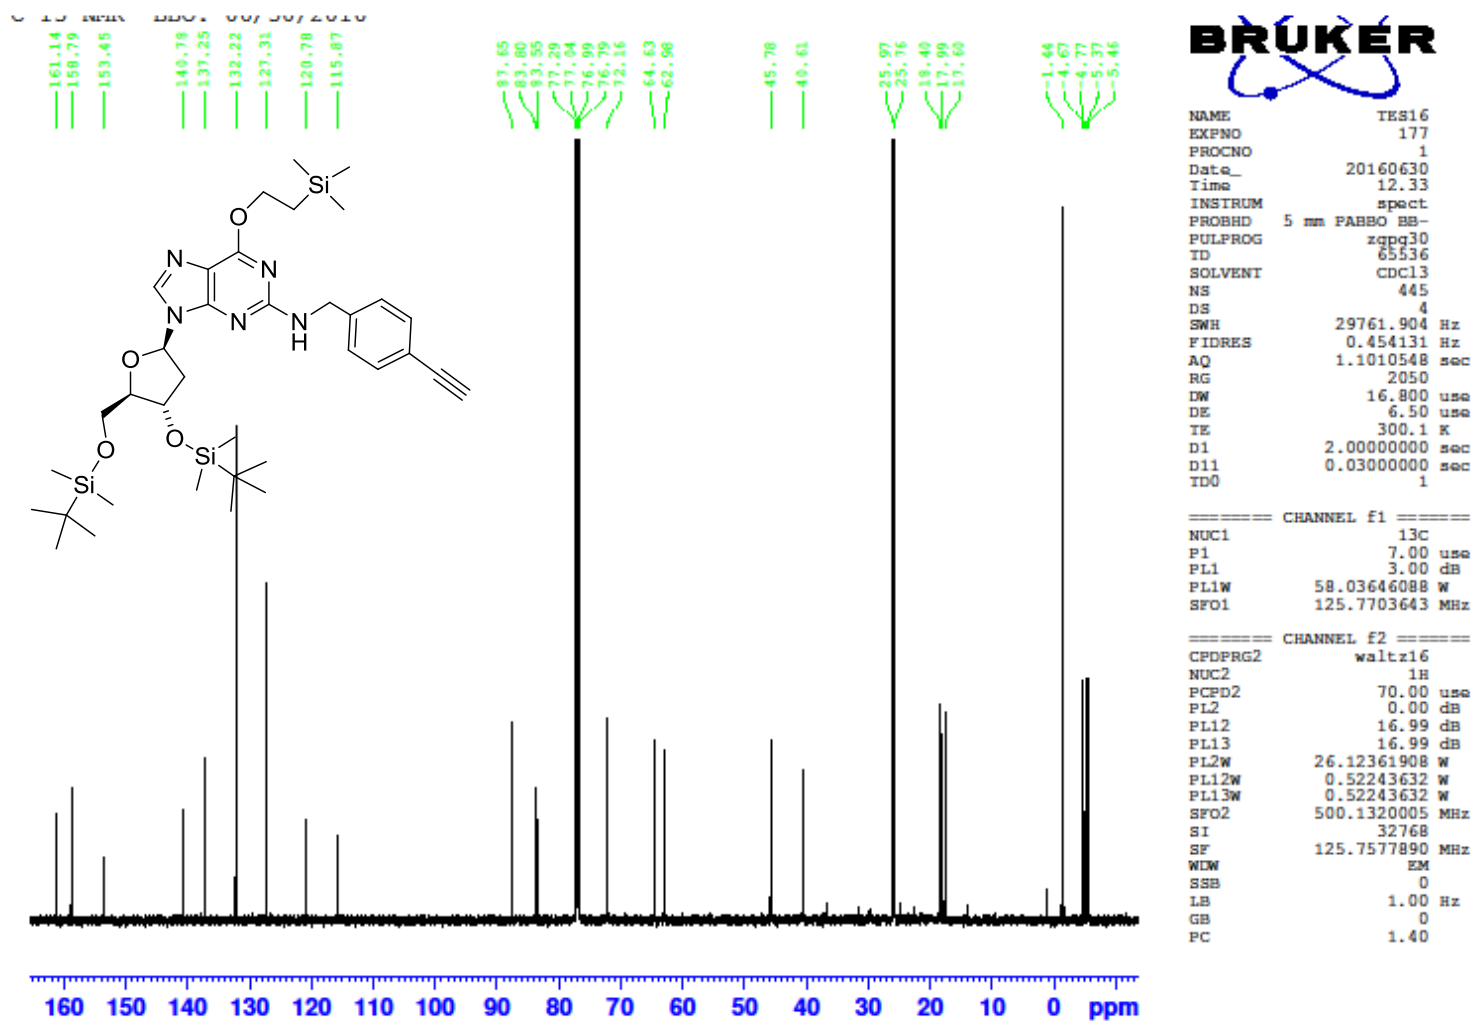Figure S30. <sup>13</sup>C NMR (CDCl<sub>3</sub>). Bis(*tert*-butyl dimethylsilyl)-*O*<sup>6</sup>-trimethylsilyl ethyl-*N*<sup>2</sup>-*p*-ethynylbenzyl-2'-deoxy-guanosine

## SUPPORTING INFORMATION

IES-51-71. N<sup>2</sup>-EBn-dG synthesis. hplc  
 1H NMR 4/20/16

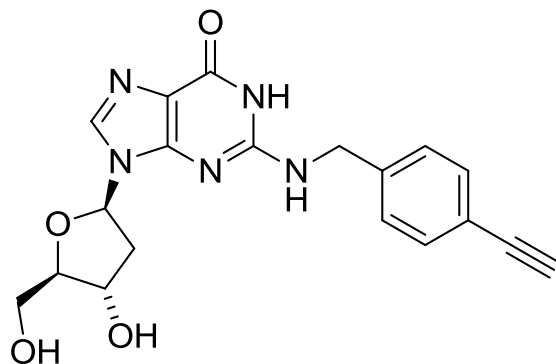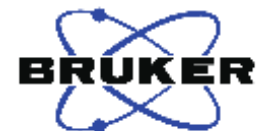

Current Data Parameters  
 NAME IES16  
 EXPNO 107  
 PROCNO 1

F2 - Acquisition Parameters  
 Date\_ 20160420  
 Time 7.30  
 INSTRUM spect  
 PROBHD 5 mm PABBO BB-  
 PULPROG zg30  
 TD 65536  
 SOLVENT DMSO  
 NS 64  
 DS 2  
 SWH 9236.453 Hz  
 FIDRES 0.140937 Hz  
 AQ 3.5476820 sec  
 RG 512  
 DW 54.133 usec  
 DE 6.50 usec  
 TE 300.2 K  
 D1 0.50000000 sec  
 TD0 1

==== CHANNEL f1 ====  
 NUC1 1H  
 P1 9.90 usec  
 PL1 0 dB  
 PL1W 26.12361908 W  
 SFO1 500.1323525 MHz

F2 - Processing parameters  
 SI 32768  
 SF 500.1300139 MHz  
 WDW EM  
 SSB 0  
 LB 0.30 Hz  
 GB 0  
 PC 4.00

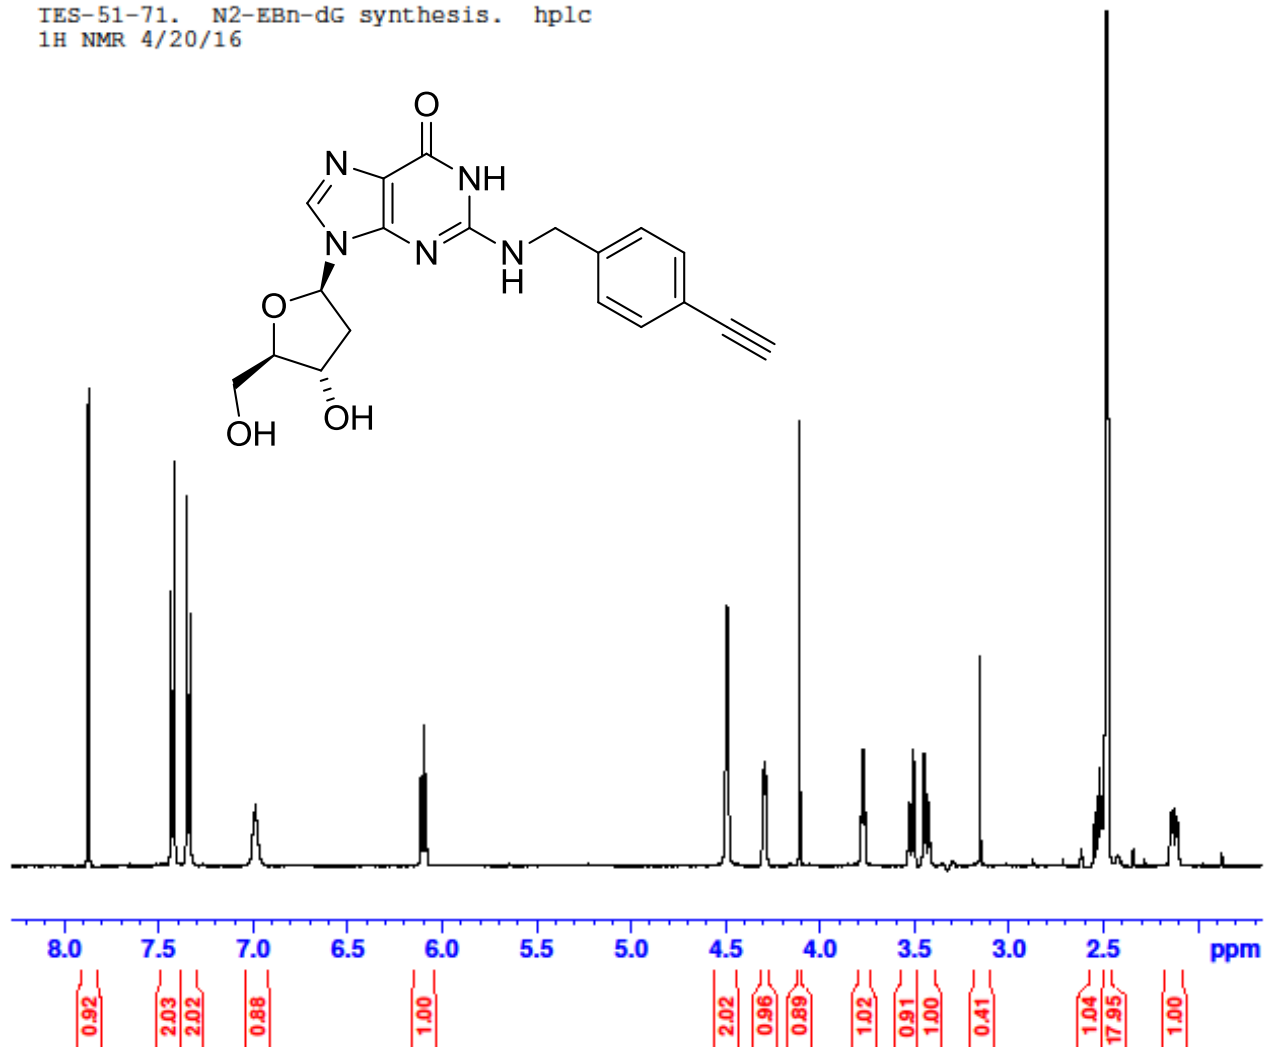

Figure S31. <sup>1</sup>H NMR (DMSO-d<sub>6</sub>). N<sup>2</sup>-p-ethynylbenzyl-2'-deoxy-guanosine

## SUPPORTING INFORMATION

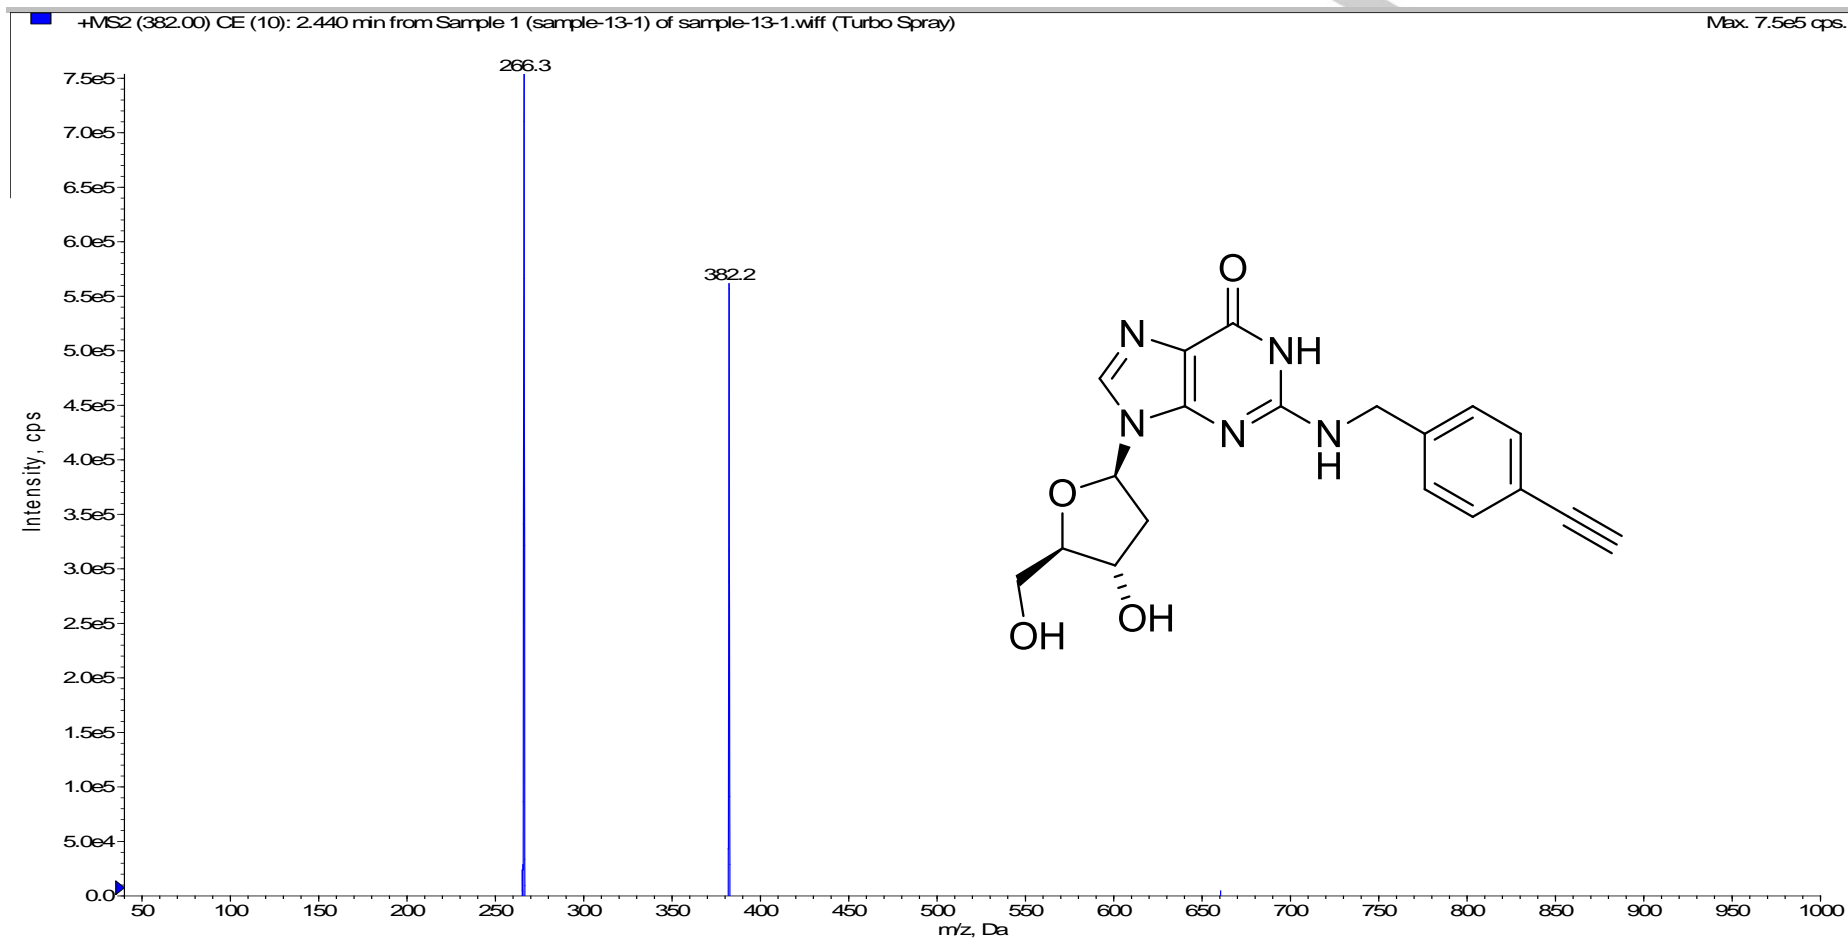Figure S32. ESI-MS  $N^2$ -p-ethynylbenzyl-2'-deoxy-guanosine

## References

- [1] D. B. Dunn, R. H. Hall, in *Handbook of Biochemistry and Molecular Biology, Vol. 1* (Ed.: G. D. Fasman), CRC Press, Boca Raton, **1986**, pp. 65-215.
- [2] P. Borer, in *Handbook of Biochemistry and Molecular Biology, Vol. 1* (Ed.: G. D. Fasman), CRC Press, Boca Raton, **1977**, p. 589.
- [3] a) P. Zhang, S. J. Zhang, Z. Zhang, J. F. Woessner, Jr., M. Y. Lee, *Biochemistry* **1995**, *34*, 10703-10712; b) X. Meng, Y. Zhou, S. Zhang, E. Y. Lee, D. N. Frick, M. Y. Lee, *Nucleic Acids Res* **2009**, *37*, 647-657.
- [4] a) J. Y. Choi, F. P. Guengerich, *J. Mol. Biol.* **2005**, *352*, 72-90; b) J. Y. Choi, F. P. Guengerich, *J. Biol. Chem.* **2006**, *281*, 12315-12324; c) J. Y. Choi, K. C. Angel, F. P. Guengerich, *J. Biol. Chem.* **2006**, *281*, 21062-21072.
- [5] A. S. Prakasha Gowda, J. M. Polizzi, K. A. Eckert, T. E. Spratt, *Biochemistry* **2010**, *49*, 4833-4840.
- [6] K.-i. Takata, T. Shimizu, S. Iwai, R. D. Wood, *J. Biol. Chem.* **2006**, *281*, 23445-23455.
- [7] A. S. Gowda, G. L. Moldovan, T. E. Spratt, *The Journal of biological chemistry* **2015**, *290*, 16292-16303.
- [8] A. Adib, P. F. Potier, S. Doronina, I. Huc, J.-P. Behr, *Tetrahedron Lett.* **1997**, *38*, 2989-2992.
- [9] a) J. Ludwig, *Acta Biochim. et Biophys. Acad. Sci. Hung.* **1981**, *16*, 131-133; b) A. R. Kore, M. Shanmugasundaram, A. Senthilvelan, B. Srinivasan, *Nucleosides, Nucleotides & Nucleic Acids* **2012**, *31*, 423-431.
- [10] B. L. DeCorte, D. Tsarouhtsis, S. Kuchimanchi, M. D. Cooper, P. Horton, C. M. Harris, T. M. Harris, *Chem. Res. Toxicol.* **1996**, *9*, 630-637.

## Author Contributions

A.S. Prakasha Gowda performed the biochemical and cell biology experiments.

Marietta Y. Lee provide the DNA polymerase  $\delta$

Thomas E. Spratt synthesized the compounds, wrote the manuscript, and supervised the project.
